# Supplementary material for: Highlighting the potential of Synechococcus elongatus PCC 7942 as platform to produce α-linolenic acid through an updated genome-scale metabolic modeling
Source: Front Microbiol. 2023 Mar 14;14:1126030. doi: 10.3389/fmicb.2023.1126030 (PMC10043229; doi:10.3389/fmicb.2023.1126030)
Supplement: Supplementary file 5 [file Table_1.XLSX]

## Sheet: Changes in iJB792
Genes		Reactions		Metabolites
added	removed	added	removed	added	removed
Synpcc7942_0015	Synpcc7942_0034	AMAA	AACPS6	acmama_c	14glucan_c
Synpcc7942_0201		CSND	DM_for_c	acmam_c	amylose_c
Synpcc7942_0338		CYSTL	GLCBRAN3	csn_c	glycogen_c
Synpcc7942_0357		DPGM	GLCDBRAN3	cyst-L_c	his__L_e
Synpcc7942_0498		DRBK	GLCP2	23dpg_c
Synpcc7942_0508		DRPA	GLYCOnadp	2dr5p_c
Synpcc7942_0568		FA100ACPHi	KAS14	g15lac_c
Synpcc7942_0652		FA120ACPHi	SK_14glucan_c	35cgmp_c
Synpcc7942_0693		FA140ACPHi	SK_amylose_c	rdxo_c
Synpcc7942_0698		FA160ACPHi	SK_glycogen_c	rdxr_c
Synpcc7942_0706		FA161ACPHi		dca_c
Synpcc7942_0714		FA180ACPHi		ddca_c
Synpcc7942_0814		FA181ACPHi		ttdca_c
Synpcc7942_0888		FA80ACPHi		hdca_c
Synpcc7942_0898		FACOAE100		hdcea_c
Synpcc7942_0974		FACOAE120		octe9_c
Synpcc7942_0983		FACOAE140		octa_c
Synpcc7942_1054		FACOAE160		dcacoa_c
Synpcc7942_1088		FACOAE161		ddcacoa_c
Synpcc7942_1255		FACOAE180		tdcoa_c
Synpcc7942_1266		FACOAE181		pmtcoa_c
Synpcc7942_1319		FACOAE80		hdcoa_c
Synpcc7942_1378		FACOAL100i		stcoa_c
Synpcc7942_1388		FACOAL120i		octe9coa_c
Synpcc7942_1408		FACOAL140i		occoa_c
Synpcc7942_1450		FACOAL160i		bglyg4n_c
Synpcc7942_1499		FACOAL161i		glyg4n_c
Synpcc7942_1516		FACOAL180i
Synpcc7942_1541		FACOAL181i
Synpcc7942_1573		FACOAL80i
Synpcc7942_1585		G1Dx
Synpcc7942_1630		GLBRAN3
Synpcc7942_1649		GLCP3
Synpcc7942_1749		GLCP4
Synpcc7942_1763		GLDBRAN3
Synpcc7942_1910		GLYCOR_nadp
Synpcc7942_2096		GUACYC
Synpcc7942_2158		PROAKGOX1
Synpcc7942_2337		RDXRr
Synpcc7942_2542
Synpcc7942_2581
Synpcc7942_B2619
Synpcc7942_B2620
Synpcc7942_B2633
Sypncc7942_0202
Sypncc7942_0239
