# Supplementary material for: Highlighting the potential of Synechococcus elongatus PCC 7942 as platform to produce α-linolenic acid through an updated genome-scale metabolic modeling
Source: Front Microbiol. 2023 Mar 14;14:1126030. doi: 10.3389/fmicb.2023.1126030 (PMC10043229; doi:10.3389/fmicb.2023.1126030)
Supplement: Supplementary file 6 [file Table_2.XLSX]

## Sheet: essentiality
ids	growth in silico		growth in vivo
Synpcc7942_0001	0		non-essential
Synpcc7942_0003	8.05291e-13		ambiguous
Synpcc7942_0004	7.95353e-13		essential
Synpcc7942_0009	0		essential
Synpcc7942_0015	0.102174		non-essential
Synpcc7942_0017	0.102174		beneficial
Synpcc7942_0018	0		essential
Synpcc7942_0019	-9.29151e-16		essential
Synpcc7942_0021	0		essential
Synpcc7942_0023	0.102174		non-essential
Synpcc7942_0027	1.38249e-13		essential
Synpcc7942_0028	0		essential
Synpcc7942_0029	0		essential
Synpcc7942_0030	-1.32736e-16		essential
Synpcc7942_0031	0		essential
Synpcc7942_0039	0.102174		non-essential
Synpcc7942_0040	-4.40478e-12		essential
Synpcc7942_0058	0.102174		non-essential
Synpcc7942_0061	0.102173		non-essential
Synpcc7942_0062	0.102174		non-essential
Synpcc7942_0070	0.102174		non-essential
Synpcc7942_0073	0		essential
Synpcc7942_0082	1.6592e-16		essential
Synpcc7942_0086	0.102173		non-essential
Synpcc7942_0091	0		essential
Synpcc7942_0093	0		essential
Synpcc7942_0094	0		essential
Synpcc7942_0097	0.102174		essential
Synpcc7942_0098	0.102173		essential
Synpcc7942_0101	0.102174		essential
Synpcc7942_0105	1.36418e-12		essential
Synpcc7942_0106	0.102174		beneficial
Synpcc7942_0113	-5.18e-15		non-essential
Synpcc7942_0116	0.102173		non-essential
Synpcc7942_0118	0		essential
Synpcc7942_0125	-3.20435e-18		essential
Synpcc7942_0126	0		essential
Synpcc7942_0135	0		non-essential
Synpcc7942_0137	0		essential
Synpcc7942_0138	0.102173		non-essential
Synpcc7942_0139	0		essential
Synpcc7942_0143	0.102174		essential
Synpcc7942_0152	0		essential
Synpcc7942_0156	0		beneficial
Synpcc7942_0158	0		essential
Synpcc7942_0166	0.102173		beneficial
Synpcc7942_0169	0.102174		non-essential
Synpcc7942_0171	0.102174		non-essential
Synpcc7942_0173	0.102174		non-essential
Synpcc7942_0185	0.102173		non-essential
Synpcc7942_0189	1.45551e-12		essential
Synpcc7942_0190	0.102174		essential
Synpcc7942_0191	0.102174		essential
Synpcc7942_0194	0		ambiguous
Synpcc7942_0198	0.102174		non-essential
Synpcc7942_0201	0.102174		non-essential
Synpcc7942_0202	0.102174		non-essential
Synpcc7942_0203	0		essential
Synpcc7942_0205	0.102174		beneficial
Synpcc7942_0206	0.102173		non-essential
Synpcc7942_0211	0.102174		essential
Synpcc7942_0212	0		essential
Synpcc7942_0221	0.102174		non-essential
Synpcc7942_0224	0		ambiguous
Synpcc7942_0225	0		essential
Synpcc7942_0232	0		essential
Synpcc7942_0239	0.102173		non-essential
Synpcc7942_0240	0.102174		non-essential
Synpcc7942_0244	0.102174		non-essential
Synpcc7942_0245	0.102174		non-essential
Synpcc7942_0246	0.102174		non-essential
Synpcc7942_0247	0.102174		non-essential
Synpcc7942_0248	0.102174		non-essential
Synpcc7942_0249	0.102174		non-essential
Synpcc7942_0256	0.102174		non-essential
Synpcc7942_0262	-1.32736e-16		essential
Synpcc7942_0264	-4.9817e-24		essential
Synpcc7942_0271	0.102174		essential
Synpcc7942_0272	-6.63679e-17		essential
Synpcc7942_0273	1.72181e-17		essential
Synpcc7942_0276	0.102173		non-essential
Synpcc7942_0278	0.102174		non-essential
Synpcc7942_0279	0.102174		non-essential
Synpcc7942_0280	0.102173		non-essential
Synpcc7942_0281	0		essential
Synpcc7942_0282	0.102174		essential
Synpcc7942_0284	3.18203e-15		essential
Synpcc7942_0285	0		essential
Synpcc7942_0288	0		essential
Synpcc7942_0290	0		essential
Synpcc7942_0292	0		essential
Synpcc7942_0294	0		beneficial
Synpcc7942_0295	0		beneficial
Synpcc7942_0307	0.102174		non-essential
Synpcc7942_0308	0.102174		non-essential
Synpcc7942_0309	0.102173		non-essential
Synpcc7942_0310	0		essential
Synpcc7942_0314	0.102174		non-essential
Synpcc7942_0315	0		essential
Synpcc7942_0320	0		essential
Synpcc7942_0322	0		essential
Synpcc7942_0323	0		essential
Synpcc7942_0325	0		ambiguous
Synpcc7942_0326	2.67779e-14		essential
Synpcc7942_0327	0		essential
Synpcc7942_0328	2.67779e-14		essential
Synpcc7942_0330	0		essential
Synpcc7942_0331	0		essential
Synpcc7942_0332	3.81911e-14		essential
Synpcc7942_0333	0		essential
Synpcc7942_0334	0		essential
Synpcc7942_0335	1.71652e-13		essential
Synpcc7942_0336	3.81911e-14		essential
Synpcc7942_0337	3.62961e-14		essential
Synpcc7942_0338	0.102174		non-essential
Synpcc7942_0343	0		beneficial
Synpcc7942_0344	0.102174		non-essential
Synpcc7942_0345	1.99104e-16		essential
Synpcc7942_0354	0.102174		non-essential
Synpcc7942_0357	0.102174		essential
Synpcc7942_0369	0.102174		non-essential
Synpcc7942_0370	0		non-essential
Synpcc7942_0371	0.102173		non-essential
Synpcc7942_0385	0.102174		essential
Synpcc7942_0392	0.102173		non-essential
Synpcc7942_0394	0		non-essential
Synpcc7942_0396	0		essential
Synpcc7942_0397	0.102174		non-essential
Synpcc7942_0400	0		essential
Synpcc7942_0401	0.102174		beneficial
Synpcc7942_0405	0		essential
Synpcc7942_0407	0		non-essential
Synpcc7942_0408	1.11328e-15		essential
Synpcc7942_0411	0		essential
Synpcc7942_0413	0.0453911		non-essential
Synpcc7942_0419	1.38249e-13		essential
Synpcc7942_0424	0		not_analyzed
Synpcc7942_0428	0		beneficial
Synpcc7942_0430	6.63679e-17		essential
Synpcc7942_0432	0.102174		non-essential
Synpcc7942_0439	0		essential
Synpcc7942_0440	0.102174		essential
Synpcc7942_0441	0		ambiguous
Synpcc7942_0442	0.102174		non-essential
Synpcc7942_0445	0.102173		non-essential
Synpcc7942_0449	0		essential
Synpcc7942_0450	2.13489e-19		essential
Synpcc7942_0454	0		essential
Synpcc7942_0455	0.102173		beneficial
Synpcc7942_0456	0		ambiguous
Synpcc7942_0458	0.102173		non-essential
Synpcc7942_0459	0.102174		non-essential
Synpcc7942_0466	0.102173		non-essential
Synpcc7942_0469	0.102174		essential
Synpcc7942_0475	0		essential
Synpcc7942_0482	0.102174		essential
Synpcc7942_0485	0.102174		essential
Synpcc7942_0486	0		essential
Synpcc7942_0488	0		essential
Synpcc7942_0489	0		non-essential
Synpcc7942_0491	0.102173		non-essential
Synpcc7942_0492	4.59641e-14		essential
Synpcc7942_0498	0.102174		non-essential
Synpcc7942_0504	0		essential
Synpcc7942_0505	0.102173		essential
Synpcc7942_0506	0		essential
Synpcc7942_0508	0.102174		non-essential
Synpcc7942_0511	0		essential
Synpcc7942_0525	-8.37424e-19		essential
Synpcc7942_0529	0.102174		non-essential
Synpcc7942_0530	0.102174		non-essential
Synpcc7942_0534	0		essential
Synpcc7942_0535	0		essential
Synpcc7942_0537	0		essential
Synpcc7942_0538	0		essential
Synpcc7942_0542	0.102174		essential
Synpcc7942_0543	0		non-essential
Synpcc7942_0546	0.102173		non-essential
Synpcc7942_0552	5.22665e-17		essential
Synpcc7942_0560	0.102174		essential
Synpcc7942_0567	0.102174		non-essential
Synpcc7942_0568	0.102174		non-essential
Synpcc7942_0570	0		essential
Synpcc7942_0576	0		essential
Synpcc7942_0578	0.102174		beneficial
Synpcc7942_0579	0.102174		beneficial
Synpcc7942_0580	0.102174		essential
Synpcc7942_0583	0		essential
Synpcc7942_0584	0		essential
Synpcc7942_0587	3.3184e-16		essential
Synpcc7942_0588	0.102174		non-essential
Synpcc7942_0592	0.102173		non-essential
Synpcc7942_0596	-5.72087e-18		essential
Synpcc7942_0597	0		non-essential
Synpcc7942_0600	0.102174		non-essential
Synpcc7942_0603	0.102174		beneficial
Synpcc7942_0604	0		essential
Synpcc7942_0608	0.102174		non-essential
Synpcc7942_0609	0.102174		non-essential
Synpcc7942_0612	0		essential
Synpcc7942_0618	0		essential
Synpcc7942_0623	0.102174		non-essential
Synpcc7942_0626	0		essential
Synpcc7942_0628	0.102174		beneficial
Synpcc7942_0638	0.102173		non-essential
Synpcc7942_0639	-1.01207e-16		essential
Synpcc7942_0641	0.102174		non-essential
Synpcc7942_0645	-2.20137e-15		essential
Synpcc7942_0652	0.102174		non-essential
Synpcc7942_0654	0		essential
Synpcc7942_0655	1.9119e-14		not_analyzed
Synpcc7942_0656	0		essential
Synpcc7942_0660	0		ambiguous
Synpcc7942_0668	0.102173		non-essential
Synpcc7942_0670	0		essential
Synpcc7942_0674	0		essential
Synpcc7942_0680	0.102173		non-essential
Synpcc7942_0681	-2.69742e-14		essential
Synpcc7942_0684	-6.81717e-18		essential
Synpcc7942_0693	0.102174		non-essential
Synpcc7942_0696	0		ambiguous
Synpcc7942_0697	0		essential
Synpcc7942_0698	0.102174		non-essential
Synpcc7942_0699	0		essential
Synpcc7942_0706	0.102174		non-essential
Synpcc7942_0707	0.102174		beneficial
Synpcc7942_0711	0		essential
Synpcc7942_0713	0		essential
Synpcc7942_0714	0.102174		non-essential
Synpcc7942_0715	0		essential
Synpcc7942_0717	0.102174		non-essential
Synpcc7942_0774	0.102174		non-essential
Synpcc7942_0775	0		essential
Synpcc7942_0776	0		essential
Synpcc7942_0777	0		essential
Synpcc7942_0780	0.102174		non-essential
Synpcc7942_0781	0.102174		non-essential
Synpcc7942_0783	0		essential
Synpcc7942_0801	0		essential
Synpcc7942_0804	0.102174		essential
Synpcc7942_0808	0.102174		non-essential
Synpcc7942_0811	0.102173		non-essential
Synpcc7942_0813	0		essential
Synpcc7942_0814	0.102174		essential
Synpcc7942_0815	0.102174		non-essential
Synpcc7942_0818	7.44185e-13		essential
Synpcc7942_0819	0		essential
Synpcc7942_0821	0.102174		non-essential
Synpcc7942_0822	0.102173		non-essential
Synpcc7942_0827	0.102174		essential
Synpcc7942_0830	0		non-essential
Synpcc7942_0842	0.102173		non-essential
Synpcc7942_0849	0		essential
Synpcc7942_0851	0		essential
Synpcc7942_0853	0		essential
Synpcc7942_0861	-2.3576e-17		ambiguous
Synpcc7942_0876	0		essential
Synpcc7942_0881	0		essential
Synpcc7942_0888	0.102174		non-essential
Synpcc7942_0890	0.102174		essential
Synpcc7942_0893	0.102174		not_analyzed
Synpcc7942_0894	0		essential
Synpcc7942_0898	0.102174		non-essential
Synpcc7942_0903	-7.76288e-14		essential
Synpcc7942_0912	0		essential
Synpcc7942_0915	0		essential
Synpcc7942_0918	0.102174		non-essential
Synpcc7942_0920	0		non-essential
Synpcc7942_0923	0.102174		non-essential
Synpcc7942_0925	0		essential
Synpcc7942_0927	0		essential
Synpcc7942_0929	0		essential
Synpcc7942_0930	0		essential
Synpcc7942_0931	0.102174		essential
Synpcc7942_0932	0		essential
Synpcc7942_0937	0.102174		non-essential
Synpcc7942_0939	0		ambiguous
Synpcc7942_0943	0		essential
Synpcc7942_0944	0		essential
Synpcc7942_0946	0.102174		non-essential
Synpcc7942_0951	3.5613e-13		beneficial
Synpcc7942_0957	0.102174		essential
Synpcc7942_0958	0.102174		non-essential
Synpcc7942_0965	0.102174		non-essential
Synpcc7942_0967	0		essential
Synpcc7942_0970	0.102174		non-essential
Synpcc7942_0973	0.102174		non-essential
Synpcc7942_0974	0.102174		non-essential
Synpcc7942_0977	0		essential
Synpcc7942_0978	0.102174		essential
Synpcc7942_0983	0.102172		non-essential
Synpcc7942_0986	0		essential
Synpcc7942_0990	-1.27189e-09		essential
Synpcc7942_0991	0.102174		non-essential
Synpcc7942_0996	0.102174		non-essential
Synpcc7942_1001	0		essential
Synpcc7942_1002	0		essential
Synpcc7942_1003	0		essential
Synpcc7942_1005	0		non-essential
Synpcc7942_1007	0.0963302		non-essential
Synpcc7942_1008	0.102174		non-essential
Synpcc7942_1019	0.102173		non-essential
Synpcc7942_1020	0		essential
Synpcc7942_1021	0		essential
Synpcc7942_1029	0		beneficial
Synpcc7942_1030	-6.50846e-16		essential
Synpcc7942_1037	0.102174		essential
Synpcc7942_1038	0		non-essential
Synpcc7942_1043	0.102174		non-essential
Synpcc7942_1044	-1.92352e-15		essential
Synpcc7942_1047	2.70082e-14		not_analyzed
Synpcc7942_1048	2.67779e-14		not_analyzed
Synpcc7942_1049	0		beneficial
Synpcc7942_1050	0		non-essential
Synpcc7942_1051	0		non-essential
Synpcc7942_1052	-1.1026e-16		not_analyzed
Synpcc7942_1053	0		not_analyzed
Synpcc7942_1054	-1.1026e-16		ambiguous
Synpcc7942_1055	0		essential
Synpcc7942_1057	0		essential
Synpcc7942_1058	0		essential
Synpcc7942_1068	0.102173		essential
Synpcc7942_1072	0.102174		beneficial
Synpcc7942_1080	0.102174		beneficial
Synpcc7942_1081	0.102174		beneficial
Synpcc7942_1082	0.102174		non-essential
Synpcc7942_1083	0		essential
Synpcc7942_1085	0.102174		non-essential
Synpcc7942_1086	0		essential
Synpcc7942_1088	0		non-essential
Synpcc7942_1093	0.102173		non-essential
Synpcc7942_1096	0		essential
Synpcc7942_1099	0		non-essential
Synpcc7942_1103	0.102174		non-essential
Synpcc7942_1106	0.0453907		non-essential
Synpcc7942_1109	2.18014e-14		essential
Synpcc7942_1111	0.102174		non-essential
Synpcc7942_1116	-4.11605e-16		essential
Synpcc7942_1121	0.102174		non-essential
Synpcc7942_1126	0		non-essential
Synpcc7942_1131	0.102174		essential
Synpcc7942_1135	0.102174		non-essential
Synpcc7942_1136	0.102174		non-essential
Synpcc7942_1142	0		essential
Synpcc7942_1149	0.102173		non-essential
Synpcc7942_1151	0		essential
Synpcc7942_1169	0.102173		non-essential
Synpcc7942_1170	-6.63679e-17		essential
Synpcc7942_1174	0		ambiguous
Synpcc7942_1175	0		essential
Synpcc7942_1176	0		essential
Synpcc7942_1177	0		essential
Synpcc7942_1180	0.0453907		essential
Synpcc7942_1181	0.0453911		essential
Synpcc7942_1182	0.0453907		essential
Synpcc7942_1184	0.102174		beneficial
Synpcc7942_1186	-1.71979e-16		essential
Synpcc7942_1189	0.102174		ambiguous
Synpcc7942_1190	0.102174		non-essential
Synpcc7942_1191	1.14736e-15		essential
Synpcc7942_1194	0.102174		essential
Synpcc7942_1197	0		essential
Synpcc7942_1198	0.102173		essential
Synpcc7942_1211	0.102174		ambiguous
Synpcc7942_1214	0.102173		non-essential
Synpcc7942_1225	0		essential
Synpcc7942_1229	0.102174		essential
Synpcc7942_1231	0		essential
Synpcc7942_1232	-1.1026e-16		essential
Synpcc7942_1233	0.102174		non-essential
Synpcc7942_1235	0.000385376		ambiguous
Synpcc7942_1236	0.000385376		beneficial
Synpcc7942_1237	0.000385277		beneficial
Synpcc7942_1238	0.000385376		ambiguous
Synpcc7942_1239	0.000385376		beneficial
Synpcc7942_1240	0.000385273		essential
Synpcc7942_1244	8.54738e-17		beneficial
Synpcc7942_1246	0.102173		non-essential
Synpcc7942_1249	0		essential
Synpcc7942_1250	0		non-essential
Synpcc7942_1255	0.102174		non-essential
Synpcc7942_1257	0.102174		non-essential
Synpcc7942_1261	9.86598e-16		essential
Synpcc7942_1264	0.102173		non-essential
Synpcc7942_1266	0.102174		non-essential
Synpcc7942_1268	0		essential
Synpcc7942_1269	0		essential
Synpcc7942_1282	0.102174		essential
Synpcc7942_1283	0.102174		essential
Synpcc7942_1284	0.102174		ambiguous
Synpcc7942_1285	0.102174		essential
Synpcc7942_1286	0.102174		essential
Synpcc7942_1293	-9.98561e-17		essential
Synpcc7942_1294	0.102174		non-essential
Synpcc7942_1297	0.102174		non-essential
Synpcc7942_1305	0.102173		non-essential
Synpcc7942_1308	0		essential
Synpcc7942_1309	0		essential
Synpcc7942_1313	0		essential
Synpcc7942_1316	0.102174		non-essential
Synpcc7942_1317	0.102174		non-essential
Synpcc7942_1318	0.102174		non-essential
Synpcc7942_1319	0.102174		non-essential
Synpcc7942_1322	0		non-essential
Synpcc7942_1332	0.102174		beneficial
Synpcc7942_1333	0.102174		beneficial
Synpcc7942_1334	6.74061e-14		beneficial
Synpcc7942_1335	-8.47363e-28		beneficial
Synpcc7942_1342	-1.32736e-16		essential
Synpcc7942_1343	0.0453911		essential
Synpcc7942_1344	0.0453911		beneficial
Synpcc7942_1345	0.045391		essential
Synpcc7942_1346	0.0453907		essential
Synpcc7942_1347	0.102173		non-essential
Synpcc7942_1352	0.101413		non-essential
Synpcc7942_1359	0		essential
Synpcc7942_1366	0		essential
Synpcc7942_1371	0		non-essential
Synpcc7942_1372	0		essential
Synpcc7942_1373	0.102174		beneficial
Synpcc7942_1378	0		essential
Synpcc7942_1379	0		essential
Synpcc7942_1383	0.102174		essential
Synpcc7942_1386	0.102174		essential
Synpcc7942_1388	0.102174		non-essential
Synpcc7942_1389	0.102174		not_analyzed
Synpcc7942_1398	0.102174		non-essential
Synpcc7942_1403	0.102174		non-essential
Synpcc7942_1406	0		essential
Synpcc7942_1407	0		essential
Synpcc7942_1408	0		non-essential
Synpcc7942_1409	0.102174		non-essential
Synpcc7942_1410	0.102174		ambiguous
Synpcc7942_1411	0.102174		beneficial
Synpcc7942_1415	0.0453911		essential
Synpcc7942_1419	0.102174		non-essential
Synpcc7942_1420	0.102173		non-essential
Synpcc7942_1421	0		essential
Synpcc7942_1422	0		essential
Synpcc7942_1423	0		essential
Synpcc7942_1424	0		essential
Synpcc7942_1425	0		essential
Synpcc7942_1426	0		essential
Synpcc7942_1427	0		essential
Synpcc7942_1428	0		essential
Synpcc7942_1432	0		essential
Synpcc7942_1433	0		essential
Synpcc7942_1435	0		essential
Synpcc7942_1439	0.102174		beneficial
Synpcc7942_1440	0		essential
Synpcc7942_1441	0.102174		essential
Synpcc7942_1443	0		essential
Synpcc7942_1447	0.102174		essential
Synpcc7942_1448	-4.34388e-19		beneficial
Synpcc7942_1449	-1.73441e-16		essential
Synpcc7942_1450	0.102174		non-essential
Synpcc7942_1454	0		essential
Synpcc7942_1455	-5.78384e-14		essential
Synpcc7942_1456	0		essential
Synpcc7942_1457	0		essential
Synpcc7942_1466	0.102174		non-essential
Synpcc7942_1468	0.102174		beneficial
Synpcc7942_1469	0.102174		beneficial
Synpcc7942_1470	0.102174		beneficial
Synpcc7942_1471	0.102174		ambiguous
Synpcc7942_1472	0.102174		beneficial
Synpcc7942_1473	0.102174		beneficial
Synpcc7942_1474	0.102174		essential
Synpcc7942_1475	0.102174		beneficial
Synpcc7942_1478	3.87788e-14		beneficial
Synpcc7942_1479	-1.1026e-16		essential
Synpcc7942_1481	0		essential
Synpcc7942_1484	0		essential
Synpcc7942_1488	0.102174		non-essential
Synpcc7942_1489	0.102174		non-essential
Synpcc7942_1490	0.102174		non-essential
Synpcc7942_1491	0.102174		non-essential
Synpcc7942_1493	0.102174		non-essential
Synpcc7942_1496	0		essential
Synpcc7942_1499	0.102174		essential
Synpcc7942_1501	0.102173		essential
Synpcc7942_1505	0		essential
Synpcc7942_1507	0.102174		non-essential
Synpcc7942_1512	-1.94056e-28		essential
Synpcc7942_1513	0		essential
Synpcc7942_1516	0.102174		essential
Synpcc7942_1519	0		essential
Synpcc7942_1530	0.102174		non-essential
Synpcc7942_1531	0.102174		non-essential
Synpcc7942_1532	0.102174		ambiguous
Synpcc7942_1533	0.102174		non-essential
Synpcc7942_1541	0.102174		non-essential
Synpcc7942_1552	0		essential
Synpcc7942_1566	0.102174		beneficial
Synpcc7942_1570	0.102174		non-essential
Synpcc7942_1573	0.102174		non-essential
Synpcc7942_1576	0.102174		non-essential
Synpcc7942_1577	0		essential
Synpcc7942_1581	0.102174		non-essential
Synpcc7942_1585	0.102174		non-essential
Synpcc7942_1588	0.102174		non-essential
Synpcc7942_1593	-1.32736e-16		essential
Synpcc7942_1594	0		essential
Synpcc7942_1595	0		essential
Synpcc7942_1596	0.102174		beneficial
Synpcc7942_1597	1.00603e-28		essential
Synpcc7942_1608	0		essential
Synpcc7942_1609	0		essential
Synpcc7942_1610	0.102173		non-essential
Synpcc7942_1611	0.102173		non-essential
Synpcc7942_1612	0.102173		non-essential
Synpcc7942_1624	0		essential
Synpcc7942_1630	0.102174		non-essential
Synpcc7942_1637	0		not_analyzed
Synpcc7942_1639	0.102174		essential
Synpcc7942_1649	0.102174		non-essential
Synpcc7942_1651	0		essential
Synpcc7942_1653	0.102174		non-essential
Synpcc7942_1656	0.102174		non-essential
Synpcc7942_1659	0.102174		non-essential
Synpcc7942_1662	1.58397e-13		essential
Synpcc7942_1667	-4.21171e-18		essential
Synpcc7942_1668	0.102173		non-essential
Synpcc7942_1669	0.102174		non-essential
Synpcc7942_1671	0.102174		non-essential
Synpcc7942_1672	0.102173		non-essential
Synpcc7942_1678	0		non-essential
Synpcc7942_1679	0		non-essential
Synpcc7942_1680	0.102173		beneficial
Synpcc7942_1681	0.102174		non-essential
Synpcc7942_1682	0.102173		beneficial
Synpcc7942_1685	0.102174		beneficial
Synpcc7942_1686	0.102174		non-essential
Synpcc7942_1687	0.102174		non-essential
Synpcc7942_1688	0.102174		non-essential
Synpcc7942_1700	7.49324e-17		essential
Synpcc7942_1705	0		beneficial
Synpcc7942_1714	0.102174		non-essential
Synpcc7942_1715	0.102174		essential
Synpcc7942_1717	0.102173		non-essential
Synpcc7942_1718	0.102173		non-essential
Synpcc7942_1719	0		essential
Synpcc7942_1722	0.102173		non-essential
Synpcc7942_1723	0.102174		non-essential
Synpcc7942_1729	0.102174		non-essential
Synpcc7942_1734	0		essential
Synpcc7942_1735	-1.32736e-16		essential
Synpcc7942_1736	1.38249e-13		essential
Synpcc7942_1737	0		essential
Synpcc7942_1738	0		essential
Synpcc7942_1740	0		essential
Synpcc7942_1741	0		essential
Synpcc7942_1742	0		essential
Synpcc7942_1743	0.0453907		essential
Synpcc7942_1744	8.07226e-19		essential
Synpcc7942_1749	0.102174		non-essential
Synpcc7942_1760	0.102173		non-essential
Synpcc7942_1763	0.102173		non-essential
Synpcc7942_1766	0.102174		non-essential
Synpcc7942_1767	0.102174		non-essential
Synpcc7942_1782	0.102174		essential
Synpcc7942_1792	0		essential
Synpcc7942_1794	0.102173		non-essential
Synpcc7942_1808	3.35923e-24		essential
Synpcc7942_1809	0.102173		non-essential
Synpcc7942_1810	0.102174		non-essential
Synpcc7942_1819	0.102174		non-essential
Synpcc7942_1825	0		ambiguous
Synpcc7942_1829	-1.24717e-16		essential
Synpcc7942_1831	-9.38071e-28		essential
Synpcc7942_1838	0.102173		non-essential
Synpcc7942_1841	4.40698e-15		essential
Synpcc7942_1844	0.102173		ambiguous
Synpcc7942_1847	0		essential
Synpcc7942_1848	0		essential
Synpcc7942_1850	0.102174		essential
Synpcc7942_1851	0.102174		essential
Synpcc7942_1852	0.102174		essential
Synpcc7942_1853	0.102174		essential
Synpcc7942_1854	0.102174		essential
Synpcc7942_1855	0.102174		essential
Synpcc7942_1857	0.102174		non-essential
Synpcc7942_1858	0		essential
Synpcc7942_1861	0.102174		non-essential
Synpcc7942_1865	0.102174		non-essential
Synpcc7942_1881	6.70648e-13		beneficial
Synpcc7942_1882	0		non-essential
Synpcc7942_1884	2.88272e-15		essential
Synpcc7942_1887	-4.36632e-20		beneficial
Synpcc7942_1889	0.102174		non-essential
Synpcc7942_1893	0.102173		non-essential
Synpcc7942_1894	0.102174		non-essential
Synpcc7942_1896	0		essential
Synpcc7942_1898	0		essential
Synpcc7942_1900	0.102174		essential
Synpcc7942_1901	-7.6718e-17		beneficial
Synpcc7942_1902	-3.20251e-10		beneficial
Synpcc7942_1903	-3.20251e-10		beneficial
Synpcc7942_1907	0		essential
Synpcc7942_1908	0.0453911		non-essential
Synpcc7942_1910	0		essential
Synpcc7942_1912a	0		non-essential
Synpcc7942_1915	0		essential
Synpcc7942_1918	0.102174		non-essential
Synpcc7942_1920	0		essential
Synpcc7942_1927	1.06189e-15		essential
Synpcc7942_1929	-1.26642e-16		essential
Synpcc7942_1933	0.102174		non-essential
Synpcc7942_1934	0.102174		non-essential
Synpcc7942_1939	0.102173		non-essential
Synpcc7942_1944	0.102174		essential
Synpcc7942_1953	0.102173		beneficial
Synpcc7942_1954	0		essential
Synpcc7942_1956	0		essential
Synpcc7942_1959	0		essential
Synpcc7942_1962	0		non-essential
Synpcc7942_1963	0.102173		non-essential
Synpcc7942_1964	1.08418e-10		essential
Synpcc7942_1967	-7.62526e-15		essential
Synpcc7942_1971	0.102174		non-essential
Synpcc7942_1973	0		essential
Synpcc7942_1976	0.102174		non-essential
Synpcc7942_1977	0.102174		beneficial
Synpcc7942_1979	0.102174		non-essential
Synpcc7942_1982	0.0453911		essential
Synpcc7942_1983	0		essential
Synpcc7942_1984	-1.26443e-16		essential
Synpcc7942_1992	0.102174		non-essential
Synpcc7942_1993	0.102174		non-essential
Synpcc7942_1994	0.102173		non-essential
Synpcc7942_1995	-2.02452e-16		essential
Synpcc7942_2000	-1.66293e-15		beneficial
Synpcc7942_2007	0		essential
Synpcc7942_2008	0.102174		non-essential
Synpcc7942_2010	0		essential
Synpcc7942_2016	0		non-essential
Synpcc7942_2025	-2.00969e-16		essential
Synpcc7942_2026	-3.03503e-17		essential
Synpcc7942_2027	2.88272e-15		essential
Synpcc7942_2028	0		essential
Synpcc7942_2029	-7.2276e-17		essential
Synpcc7942_2030	0		essential
Synpcc7942_2041	-3.04302e-16		essential
Synpcc7942_2043	0.102173		non-essential
Synpcc7942_2046	0.102174		non-essential
Synpcc7942_2047	0.102174		non-essential
Synpcc7942_2048	2.78218e-15		essential
Synpcc7942_2049	0		essential
Synpcc7942_2055	0		essential
Synpcc7942_2057	0		essential
Synpcc7942_2058	-1.32736e-16		essential
Synpcc7942_2062	5.47477e-16		essential
Synpcc7942_2063	0.102174		non-essential
Synpcc7942_2064	0		essential
Synpcc7942_2078	0.102174		non-essential
Synpcc7942_2079	0.102174		non-essential
Synpcc7942_2080	0.102174		non-essential
Synpcc7942_2084	0		essential
Synpcc7942_2087	0		essential
Synpcc7942_2090	0		essential
Synpcc7942_2091	0.0453911		beneficial
Synpcc7942_2092	0.0453907		beneficial
Synpcc7942_2093	0.0453907		beneficial
Synpcc7942_2094	0.0453911		non-essential
Synpcc7942_2096	0.102174		non-essential
Synpcc7942_2098	0.102174		non-essential
Synpcc7942_2099	0.102174		non-essential
Synpcc7942_2100	0.102174		non-essential
Synpcc7942_2101	0.102173		non-essential
Synpcc7942_2104	0.102174		non-essential
Synpcc7942_2105	0.102174		non-essential
Synpcc7942_2106	0.102174		non-essential
Synpcc7942_2107	0.102174		non-essential
Synpcc7942_2110	0.102174		essential
Synpcc7942_2111	0.102174		beneficial
Synpcc7942_2113	0		essential
Synpcc7942_2117	0		essential
Synpcc7942_2122	0		essential
Synpcc7942_2123	6.60584e-20		essential
Synpcc7942_2132	0		beneficial
Synpcc7942_2134	0.102173		non-essential
Synpcc7942_2136	0		essential
Synpcc7942_2137	0		essential
Synpcc7942_2143	0		essential
Synpcc7942_2145	0.102173		beneficial
Synpcc7942_2151	0.102173		non-essential
Synpcc7942_2156	0.102174		non-essential
Synpcc7942_2158	-4.49395e-16		non-essential
Synpcc7942_2160	0.102173		beneficial
Synpcc7942_2164	0.102174		non-essential
Synpcc7942_2175	0.102174		non-essential
Synpcc7942_2177	0.102174		non-essential
Synpcc7942_2186	0.102173		non-essential
Synpcc7942_2188	0		essential
Synpcc7942_2197	-1.32736e-16		essential
Synpcc7942_2199	0		essential
Synpcc7942_2201	0		essential
Synpcc7942_2213	1.81836e-17		essential
Synpcc7942_2234	0.0453911		essential
Synpcc7942_2236	0.102174		non-essential
Synpcc7942_2243	0.102173		non-essential
Synpcc7942_2244	0		essential
Synpcc7942_2245	0		beneficial
Synpcc7942_2249	0.102173		non-essential
Synpcc7942_2252	0.102174		essential
Synpcc7942_2253	0.102174		non-essential
Synpcc7942_2257	0.0453907		non-essential
Synpcc7942_2258	0.102174		non-essential
Synpcc7942_2263	0		essential
Synpcc7942_2265	0.102173		essential
Synpcc7942_2266	0.102174		non-essential
Synpcc7942_2268	0		essential
Synpcc7942_2271	0.102174		non-essential
Synpcc7942_2272	1.43269e-29		essential
Synpcc7942_2274	0		essential
Synpcc7942_2279	0.102174		non-essential
Synpcc7942_2285	0.102174		non-essential
Synpcc7942_2286	0		essential
Synpcc7942_2287	-1.32736e-16		essential
Synpcc7942_2288	0		non-essential
Synpcc7942_2289	0		essential
Synpcc7942_2290	0		essential
Synpcc7942_2291	0		essential
Synpcc7942_2296	0.102174		non-essential
Synpcc7942_2297	0.102174		non-essential
Synpcc7942_2303	-4.21171e-18		beneficial
Synpcc7942_2304	0.102174		non-essential
Synpcc7942_2308	0.102174		non-essential
Synpcc7942_2310	0		essential
Synpcc7942_2312	-6.08604e-16		essential
Synpcc7942_2315	0		essential
Synpcc7942_2316	0		ambiguous
Synpcc7942_2317	0.102174		non-essential
Synpcc7942_2321	0		essential
Synpcc7942_2322	0		essential
Synpcc7942_2324	0.102174		non-essential
Synpcc7942_2331	-1.1026e-16		essential
Synpcc7942_2332	3.87788e-14		essential
Synpcc7942_2334	0.102174		non-essential
Synpcc7942_2335	0.102173		non-essential
Synpcc7942_2337	0.102174		non-essential
Synpcc7942_2339	0		essential
Synpcc7942_2341	0.102174		essential
Synpcc7942_2342	0		beneficial
Synpcc7942_2343	0		ambiguous
Synpcc7942_2348	0.102174		non-essential
Synpcc7942_2353	-1.32736e-16		essential
Synpcc7942_2359	0.102174		essential
Synpcc7942_2360	0.102174		non-essential
Synpcc7942_2361	-1.63195e-16		essential
Synpcc7942_2362	0		essential
Synpcc7942_2371	0.102174		beneficial
Synpcc7942_2373	0.102174		non-essential
Synpcc7942_2375	0		essential
Synpcc7942_2379	-3.38168e-18		non-essential
Synpcc7942_2381	-1.11268e-30		essential
Synpcc7942_2382	0.102174		non-essential
Synpcc7942_2384	0.102174		non-essential
Synpcc7942_2387	0.102174		non-essential
Synpcc7942_2388	0.102173		non-essential
Synpcc7942_2390	0.102174		non-essential
Synpcc7942_2393	2.65472e-16		essential
Synpcc7942_2394	0.102174		essential
Synpcc7942_2402	0.102174		beneficial
Synpcc7942_2406	0		essential
Synpcc7942_2409	0		essential
Synpcc7942_2415	0		essential
Synpcc7942_2420	0.102173		ambiguous
Synpcc7942_2426	0		ambiguous
Synpcc7942_2434	0		essential
Synpcc7942_2437	0		essential
Synpcc7942_2439	0		essential
Synpcc7942_2441	0.102173		essential
Synpcc7942_2442	0		essential
Synpcc7942_2443	3.23345e-13		essential
Synpcc7942_2444	0.102173		beneficial
Synpcc7942_2445	0.102173		non-essential
Synpcc7942_2454	0		non-essential
Synpcc7942_2457	0		essential
Synpcc7942_2460	0.102174		essential
Synpcc7942_2463	0		essential
Synpcc7942_2464	0.102174		non-essential
Synpcc7942_2467	8.15089e-19		essential
Synpcc7942_2475	0		essential
Synpcc7942_2478	0		non-essential
Synpcc7942_2480	0.102174		non-essential
Synpcc7942_2487	0.0453911		non-essential
Synpcc7942_2497	0		ambiguous
Synpcc7942_2501	0		essential
Synpcc7942_2503	0		essential
Synpcc7942_2506	-9.95519e-16		ambiguous
Synpcc7942_2508	0		beneficial
Synpcc7942_2513	0		essential
Synpcc7942_2514	-3.3184e-17		essential
Synpcc7942_2518	0.102174		beneficial
Synpcc7942_2522	0		essential
Synpcc7942_2527	0.102174		non-essential
Synpcc7942_2532	0.102174		non-essential
Synpcc7942_2542	0.102174		non-essential
Synpcc7942_2545	0		essential
Synpcc7942_2548	0		essential
Synpcc7942_2552	0.102174		non-essential
Synpcc7942_2553	0.102174		non-essential
Synpcc7942_2554	0.102174		non-essential
Synpcc7942_2555	0.102174		non-essential
Synpcc7942_2556	0.102174		non-essential
Synpcc7942_2557	0.102174		non-essential
Synpcc7942_2561	0		essential
Synpcc7942_2564	0		essential
Synpcc7942_2567	0		essential
Synpcc7942_2569	-4.21171e-18		essential
Synpcc7942_2570	0		essential
Synpcc7942_2573	0.102174		non-essential
Synpcc7942_2574	0.102174		non-essential
Synpcc7942_2575	0.102173		non-essential
Synpcc7942_2577	0.102173		non-essential
Synpcc7942_2581	0.102174		essential
Synpcc7942_2582	0.102173		non-essential
Synpcc7942_2588	1.05183e-10		essential
Synpcc7942_2592	0		essential
Synpcc7942_2600	0.102174		non-essential
Synpcc7942_2601	0.102174		non-essential
Synpcc7942_2602	0.102174		non-essential
Synpcc7942_2603	0.102174		non-essential
Synpcc7942_2604	0.102174		non-essential
Synpcc7942_2606	0		non-essential
Synpcc7942_2610	1.74467e-20		essential
Synpcc7942_2611	-1.32736e-16		essential
Synpcc7942_2612	0.102174		essential
Synpcc7942_2613	0.102174		non-essential
Synpcc7942_B2619	0.102174		non-essential
Synpcc7942_B2620	0.102174		non-essential
Synpcc7942_B2623	0.102173		non-essential
Synpcc7942_B2624	0.102174		non-essential
Synpcc7942_B2633	0.102174		non-essential
Synpcc7942_B2663	0.102174		non-essential
Synpcc7942_B2664	0.102173		non-essential

## Sheet: accuracy
ids	growth in silico		growth in vivo
Synpcc7942_0001	no	FN	yes
Synpcc7942_0113	no	FN	yes				number of genes
Synpcc7942_0135	no	FN	yes			TP	330		TP = True Positive (non-essential in vivo and in silico)
Synpcc7942_0156	no	FN	yes			TN	333		TN = True Negative (essential in vivo and in silico)
Synpcc7942_0294	no	FN	yes			FP	75		FP = False Positive (essential in vivo, but non-essential in silico)
Synpcc7942_0295	no	FN	yes			FN	62		FN = False Negative (non-essential in vivo, but essential in silico)
Synpcc7942_0343	no	FN	yes			NA	37
Synpcc7942_0370	no	FN	yes			Total	837
Synpcc7942_0394	no	FN	yes
Synpcc7942_0407	no	FN	yes
Synpcc7942_0428	no	FN	yes
Synpcc7942_0489	no	FN	yes
Synpcc7942_0543	no	FN	yes				number of genes	% each category
Synpcc7942_0597	no	FN	yes			TP	330	41.25
Synpcc7942_0830	no	FN	yes			TN	333	41.625
Synpcc7942_0920	no	FN	yes			FP	75	9.375
Synpcc7942_0951	no	FN	yes			FN	62	7.75
Synpcc7942_1005	no	FN	yes
Synpcc7942_1029	no	FN	yes			Total	800	100
Synpcc7942_1038	no	FN	yes
Synpcc7942_1049	no	FN	yes
Synpcc7942_1050	no	FN	yes
Synpcc7942_1051	no	FN	yes
Synpcc7942_1088	no	FN	yes
Synpcc7942_1099	no	FN	yes
Synpcc7942_1126	no	FN	yes
Synpcc7942_1236	no	FN	yes
Synpcc7942_1237	no	FN	yes
Synpcc7942_1239	no	FN	yes
Synpcc7942_1244	no	FN	yes
Synpcc7942_1250	no	FN	yes
Synpcc7942_1322	no	FN	yes
Synpcc7942_1334	no	FN	yes
Synpcc7942_1335	no	FN	yes
Synpcc7942_1371	no	FN	yes
Synpcc7942_1408	no	FN	yes
Synpcc7942_1448	no	FN	yes
Synpcc7942_1478	no	FN	yes
Synpcc7942_1678	no	FN	yes
Synpcc7942_1679	no	FN	yes
Synpcc7942_1705	no	FN	yes
Synpcc7942_1881	no	FN	yes
Synpcc7942_1882	no	FN	yes
Synpcc7942_1887	no	FN	yes
Synpcc7942_1901	no	FN	yes
Synpcc7942_1902	no	FN	yes
Synpcc7942_1903	no	FN	yes
Synpcc7942_1912a	no	FN	yes
Synpcc7942_1962	no	FN	yes
Synpcc7942_2000	no	FN	yes
Synpcc7942_2016	no	FN	yes
Synpcc7942_2132	no	FN	yes
Synpcc7942_2158	no	FN	yes
Synpcc7942_2245	no	FN	yes
Synpcc7942_2288	no	FN	yes
Synpcc7942_2303	no	FN	yes
Synpcc7942_2342	no	FN	yes
Synpcc7942_2379	no	FN	yes
Synpcc7942_2454	no	FN	yes
Synpcc7942_2478	no	FN	yes
Synpcc7942_2508	no	FN	yes
Synpcc7942_2606	no	FN	yes
Synpcc7942_0097	yes	FP	no
Synpcc7942_0098	yes	FP	no
Synpcc7942_0101	yes	FP	no
Synpcc7942_0143	yes	FP	no
Synpcc7942_0190	yes	FP	no
Synpcc7942_0191	yes	FP	no
Synpcc7942_0211	yes	FP	no
Synpcc7942_0271	yes	FP	no
Synpcc7942_0282	yes	FP	no
Synpcc7942_0357	yes	FP	no
Synpcc7942_0385	yes	FP	no
Synpcc7942_0440	yes	FP	no
Synpcc7942_0469	yes	FP	no
Synpcc7942_0482	yes	FP	no
Synpcc7942_0485	yes	FP	no
Synpcc7942_0505	yes	FP	no
Synpcc7942_0542	yes	FP	no
Synpcc7942_0560	yes	FP	no
Synpcc7942_0580	yes	FP	no
Synpcc7942_0804	yes	FP	no
Synpcc7942_0814	yes	FP	no
Synpcc7942_0827	yes	FP	no
Synpcc7942_0890	yes	FP	no
Synpcc7942_0931	yes	FP	no
Synpcc7942_0957	yes	FP	no
Synpcc7942_0978	yes	FP	no
Synpcc7942_1037	yes	FP	no
Synpcc7942_1068	yes	FP	no
Synpcc7942_1131	yes	FP	no
Synpcc7942_1180	yes	FP	no
Synpcc7942_1181	yes	FP	no
Synpcc7942_1182	yes	FP	no
Synpcc7942_1194	yes	FP	no
Synpcc7942_1198	yes	FP	no
Synpcc7942_1229	yes	FP	no
Synpcc7942_1282	yes	FP	no
Synpcc7942_1283	yes	FP	no
Synpcc7942_1285	yes	FP	no
Synpcc7942_1286	yes	FP	no
Synpcc7942_1343	yes	FP	no
Synpcc7942_1345	yes	FP	no
Synpcc7942_1346	yes	FP	no
Synpcc7942_1383	yes	FP	no
Synpcc7942_1386	yes	FP	no
Synpcc7942_1415	yes	FP	no
Synpcc7942_1441	yes	FP	no
Synpcc7942_1447	yes	FP	no
Synpcc7942_1474	yes	FP	no
Synpcc7942_1499	yes	FP	no
Synpcc7942_1501	yes	FP	no
Synpcc7942_1516	yes	FP	no
Synpcc7942_1639	yes	FP	no
Synpcc7942_1715	yes	FP	no
Synpcc7942_1743	yes	FP	no
Synpcc7942_1782	yes	FP	no
Synpcc7942_1850	yes	FP	no
Synpcc7942_1851	yes	FP	no
Synpcc7942_1852	yes	FP	no
Synpcc7942_1853	yes	FP	no
Synpcc7942_1854	yes	FP	no
Synpcc7942_1855	yes	FP	no
Synpcc7942_1900	yes	FP	no
Synpcc7942_1944	yes	FP	no
Synpcc7942_1982	yes	FP	no
Synpcc7942_2110	yes	FP	no
Synpcc7942_2234	yes	FP	no
Synpcc7942_2252	yes	FP	no
Synpcc7942_2265	yes	FP	no
Synpcc7942_2341	yes	FP	no
Synpcc7942_2359	yes	FP	no
Synpcc7942_2394	yes	FP	no
Synpcc7942_2441	yes	FP	no
Synpcc7942_2460	yes	FP	no
Synpcc7942_2581	yes	FP	no
Synpcc7942_2612	yes	FP	no
Synpcc7942_0003	no	NA	ambiguous
Synpcc7942_0194	no	NA	ambiguous
Synpcc7942_0224	no	NA	ambiguous
Synpcc7942_0325	no	NA	ambiguous
Synpcc7942_0424	no	NA	not_analyzed
Synpcc7942_0441	no	NA	ambiguous
Synpcc7942_0456	no	NA	ambiguous
Synpcc7942_0655	no	NA	not_analyzed
Synpcc7942_0660	no	NA	ambiguous
Synpcc7942_0696	no	NA	ambiguous
Synpcc7942_0861	no	NA	ambiguous
Synpcc7942_0939	no	NA	ambiguous
Synpcc7942_1047	no	NA	not_analyzed
Synpcc7942_1048	no	NA	not_analyzed
Synpcc7942_1052	no	NA	not_analyzed
Synpcc7942_1053	no	NA	not_analyzed
Synpcc7942_1054	no	NA	ambiguous
Synpcc7942_1174	no	NA	ambiguous
Synpcc7942_1235	no	NA	ambiguous
Synpcc7942_1238	no	NA	ambiguous
Synpcc7942_1637	no	NA	not_analyzed
Synpcc7942_1825	no	NA	ambiguous
Synpcc7942_2316	no	NA	ambiguous
Synpcc7942_2343	no	NA	ambiguous
Synpcc7942_2426	no	NA	ambiguous
Synpcc7942_2497	no	NA	ambiguous
Synpcc7942_2506	no	NA	ambiguous
Synpcc7942_0893	yes	NA	not_analyzed
Synpcc7942_1189	yes	NA	ambiguous
Synpcc7942_1211	yes	NA	ambiguous
Synpcc7942_1284	yes	NA	ambiguous
Synpcc7942_1389	yes	NA	not_analyzed
Synpcc7942_1410	yes	NA	ambiguous
Synpcc7942_1471	yes	NA	ambiguous
Synpcc7942_1532	yes	NA	ambiguous
Synpcc7942_1844	yes	NA	ambiguous
Synpcc7942_2420	yes	NA	ambiguous
Synpcc7942_0004	no	TN	no
Synpcc7942_0009	no	TN	no
Synpcc7942_0018	no	TN	no
Synpcc7942_0019	no	TN	no
Synpcc7942_0021	no	TN	no
Synpcc7942_0027	no	TN	no
Synpcc7942_0028	no	TN	no
Synpcc7942_0029	no	TN	no
Synpcc7942_0030	no	TN	no
Synpcc7942_0031	no	TN	no
Synpcc7942_0040	no	TN	no
Synpcc7942_0073	no	TN	no
Synpcc7942_0082	no	TN	no
Synpcc7942_0091	no	TN	no
Synpcc7942_0093	no	TN	no
Synpcc7942_0094	no	TN	no
Synpcc7942_0105	no	TN	no
Synpcc7942_0118	no	TN	no
Synpcc7942_0125	no	TN	no
Synpcc7942_0126	no	TN	no
Synpcc7942_0137	no	TN	no
Synpcc7942_0139	no	TN	no
Synpcc7942_0152	no	TN	no
Synpcc7942_0158	no	TN	no
Synpcc7942_0189	no	TN	no
Synpcc7942_0203	no	TN	no
Synpcc7942_0212	no	TN	no
Synpcc7942_0225	no	TN	no
Synpcc7942_0232	no	TN	no
Synpcc7942_0262	no	TN	no
Synpcc7942_0264	no	TN	no
Synpcc7942_0272	no	TN	no
Synpcc7942_0273	no	TN	no
Synpcc7942_0281	no	TN	no
Synpcc7942_0284	no	TN	no
Synpcc7942_0285	no	TN	no
Synpcc7942_0288	no	TN	no
Synpcc7942_0290	no	TN	no
Synpcc7942_0292	no	TN	no
Synpcc7942_0310	no	TN	no
Synpcc7942_0315	no	TN	no
Synpcc7942_0320	no	TN	no
Synpcc7942_0322	no	TN	no
Synpcc7942_0323	no	TN	no
Synpcc7942_0326	no	TN	no
Synpcc7942_0327	no	TN	no
Synpcc7942_0328	no	TN	no
Synpcc7942_0330	no	TN	no
Synpcc7942_0331	no	TN	no
Synpcc7942_0332	no	TN	no
Synpcc7942_0333	no	TN	no
Synpcc7942_0334	no	TN	no
Synpcc7942_0335	no	TN	no
Synpcc7942_0336	no	TN	no
Synpcc7942_0337	no	TN	no
Synpcc7942_0345	no	TN	no
Synpcc7942_0396	no	TN	no
Synpcc7942_0400	no	TN	no
Synpcc7942_0405	no	TN	no
Synpcc7942_0408	no	TN	no
Synpcc7942_0411	no	TN	no
Synpcc7942_0419	no	TN	no
Synpcc7942_0430	no	TN	no
Synpcc7942_0439	no	TN	no
Synpcc7942_0449	no	TN	no
Synpcc7942_0450	no	TN	no
Synpcc7942_0454	no	TN	no
Synpcc7942_0475	no	TN	no
Synpcc7942_0486	no	TN	no
Synpcc7942_0488	no	TN	no
Synpcc7942_0492	no	TN	no
Synpcc7942_0504	no	TN	no
Synpcc7942_0506	no	TN	no
Synpcc7942_0511	no	TN	no
Synpcc7942_0525	no	TN	no
Synpcc7942_0534	no	TN	no
Synpcc7942_0535	no	TN	no
Synpcc7942_0537	no	TN	no
Synpcc7942_0538	no	TN	no
Synpcc7942_0552	no	TN	no
Synpcc7942_0570	no	TN	no
Synpcc7942_0576	no	TN	no
Synpcc7942_0583	no	TN	no
Synpcc7942_0584	no	TN	no
Synpcc7942_0587	no	TN	no
Synpcc7942_0596	no	TN	no
Synpcc7942_0604	no	TN	no
Synpcc7942_0612	no	TN	no
Synpcc7942_0618	no	TN	no
Synpcc7942_0626	no	TN	no
Synpcc7942_0639	no	TN	no
Synpcc7942_0645	no	TN	no
Synpcc7942_0654	no	TN	no
Synpcc7942_0656	no	TN	no
Synpcc7942_0670	no	TN	no
Synpcc7942_0674	no	TN	no
Synpcc7942_0681	no	TN	no
Synpcc7942_0684	no	TN	no
Synpcc7942_0697	no	TN	no
Synpcc7942_0699	no	TN	no
Synpcc7942_0711	no	TN	no
Synpcc7942_0713	no	TN	no
Synpcc7942_0715	no	TN	no
Synpcc7942_0775	no	TN	no
Synpcc7942_0776	no	TN	no
Synpcc7942_0777	no	TN	no
Synpcc7942_0783	no	TN	no
Synpcc7942_0801	no	TN	no
Synpcc7942_0813	no	TN	no
Synpcc7942_0818	no	TN	no
Synpcc7942_0819	no	TN	no
Synpcc7942_0849	no	TN	no
Synpcc7942_0851	no	TN	no
Synpcc7942_0853	no	TN	no
Synpcc7942_0876	no	TN	no
Synpcc7942_0881	no	TN	no
Synpcc7942_0894	no	TN	no
Synpcc7942_0903	no	TN	no
Synpcc7942_0912	no	TN	no
Synpcc7942_0915	no	TN	no
Synpcc7942_0925	no	TN	no
Synpcc7942_0927	no	TN	no
Synpcc7942_0929	no	TN	no
Synpcc7942_0930	no	TN	no
Synpcc7942_0932	no	TN	no
Synpcc7942_0943	no	TN	no
Synpcc7942_0944	no	TN	no
Synpcc7942_0967	no	TN	no
Synpcc7942_0977	no	TN	no
Synpcc7942_0986	no	TN	no
Synpcc7942_0990	no	TN	no
Synpcc7942_1001	no	TN	no
Synpcc7942_1002	no	TN	no
Synpcc7942_1003	no	TN	no
Synpcc7942_1020	no	TN	no
Synpcc7942_1021	no	TN	no
Synpcc7942_1030	no	TN	no
Synpcc7942_1044	no	TN	no
Synpcc7942_1055	no	TN	no
Synpcc7942_1057	no	TN	no
Synpcc7942_1058	no	TN	no
Synpcc7942_1083	no	TN	no
Synpcc7942_1086	no	TN	no
Synpcc7942_1096	no	TN	no
Synpcc7942_1109	no	TN	no
Synpcc7942_1116	no	TN	no
Synpcc7942_1142	no	TN	no
Synpcc7942_1151	no	TN	no
Synpcc7942_1170	no	TN	no
Synpcc7942_1175	no	TN	no
Synpcc7942_1176	no	TN	no
Synpcc7942_1177	no	TN	no
Synpcc7942_1186	no	TN	no
Synpcc7942_1191	no	TN	no
Synpcc7942_1197	no	TN	no
Synpcc7942_1225	no	TN	no
Synpcc7942_1231	no	TN	no
Synpcc7942_1232	no	TN	no
Synpcc7942_1240	no	TN	no
Synpcc7942_1249	no	TN	no
Synpcc7942_1261	no	TN	no
Synpcc7942_1268	no	TN	no
Synpcc7942_1269	no	TN	no
Synpcc7942_1293	no	TN	no
Synpcc7942_1308	no	TN	no
Synpcc7942_1309	no	TN	no
Synpcc7942_1313	no	TN	no
Synpcc7942_1342	no	TN	no
Synpcc7942_1359	no	TN	no
Synpcc7942_1366	no	TN	no
Synpcc7942_1372	no	TN	no
Synpcc7942_1378	no	TN	no
Synpcc7942_1379	no	TN	no
Synpcc7942_1406	no	TN	no
Synpcc7942_1407	no	TN	no
Synpcc7942_1421	no	TN	no
Synpcc7942_1422	no	TN	no
Synpcc7942_1423	no	TN	no
Synpcc7942_1424	no	TN	no
Synpcc7942_1425	no	TN	no
Synpcc7942_1426	no	TN	no
Synpcc7942_1427	no	TN	no
Synpcc7942_1428	no	TN	no
Synpcc7942_1432	no	TN	no
Synpcc7942_1433	no	TN	no
Synpcc7942_1435	no	TN	no
Synpcc7942_1440	no	TN	no
Synpcc7942_1443	no	TN	no
Synpcc7942_1449	no	TN	no
Synpcc7942_1454	no	TN	no
Synpcc7942_1455	no	TN	no
Synpcc7942_1456	no	TN	no
Synpcc7942_1457	no	TN	no
Synpcc7942_1479	no	TN	no
Synpcc7942_1481	no	TN	no
Synpcc7942_1484	no	TN	no
Synpcc7942_1496	no	TN	no
Synpcc7942_1505	no	TN	no
Synpcc7942_1512	no	TN	no
Synpcc7942_1513	no	TN	no
Synpcc7942_1519	no	TN	no
Synpcc7942_1552	no	TN	no
Synpcc7942_1577	no	TN	no
Synpcc7942_1593	no	TN	no
Synpcc7942_1594	no	TN	no
Synpcc7942_1595	no	TN	no
Synpcc7942_1597	no	TN	no
Synpcc7942_1608	no	TN	no
Synpcc7942_1609	no	TN	no
Synpcc7942_1624	no	TN	no
Synpcc7942_1651	no	TN	no
Synpcc7942_1662	no	TN	no
Synpcc7942_1667	no	TN	no
Synpcc7942_1700	no	TN	no
Synpcc7942_1719	no	TN	no
Synpcc7942_1734	no	TN	no
Synpcc7942_1735	no	TN	no
Synpcc7942_1736	no	TN	no
Synpcc7942_1737	no	TN	no
Synpcc7942_1738	no	TN	no
Synpcc7942_1740	no	TN	no
Synpcc7942_1741	no	TN	no
Synpcc7942_1742	no	TN	no
Synpcc7942_1744	no	TN	no
Synpcc7942_1792	no	TN	no
Synpcc7942_1808	no	TN	no
Synpcc7942_1829	no	TN	no
Synpcc7942_1831	no	TN	no
Synpcc7942_1841	no	TN	no
Synpcc7942_1847	no	TN	no
Synpcc7942_1848	no	TN	no
Synpcc7942_1858	no	TN	no
Synpcc7942_1884	no	TN	no
Synpcc7942_1896	no	TN	no
Synpcc7942_1898	no	TN	no
Synpcc7942_1907	no	TN	no
Synpcc7942_1910	no	TN	no
Synpcc7942_1915	no	TN	no
Synpcc7942_1920	no	TN	no
Synpcc7942_1927	no	TN	no
Synpcc7942_1929	no	TN	no
Synpcc7942_1954	no	TN	no
Synpcc7942_1956	no	TN	no
Synpcc7942_1959	no	TN	no
Synpcc7942_1964	no	TN	no
Synpcc7942_1967	no	TN	no
Synpcc7942_1973	no	TN	no
Synpcc7942_1983	no	TN	no
Synpcc7942_1984	no	TN	no
Synpcc7942_1995	no	TN	no
Synpcc7942_2007	no	TN	no
Synpcc7942_2010	no	TN	no
Synpcc7942_2025	no	TN	no
Synpcc7942_2026	no	TN	no
Synpcc7942_2027	no	TN	no
Synpcc7942_2028	no	TN	no
Synpcc7942_2029	no	TN	no
Synpcc7942_2030	no	TN	no
Synpcc7942_2041	no	TN	no
Synpcc7942_2048	no	TN	no
Synpcc7942_2049	no	TN	no
Synpcc7942_2055	no	TN	no
Synpcc7942_2057	no	TN	no
Synpcc7942_2058	no	TN	no
Synpcc7942_2062	no	TN	no
Synpcc7942_2064	no	TN	no
Synpcc7942_2084	no	TN	no
Synpcc7942_2087	no	TN	no
Synpcc7942_2090	no	TN	no
Synpcc7942_2113	no	TN	no
Synpcc7942_2117	no	TN	no
Synpcc7942_2122	no	TN	no
Synpcc7942_2123	no	TN	no
Synpcc7942_2136	no	TN	no
Synpcc7942_2137	no	TN	no
Synpcc7942_2143	no	TN	no
Synpcc7942_2188	no	TN	no
Synpcc7942_2197	no	TN	no
Synpcc7942_2199	no	TN	no
Synpcc7942_2201	no	TN	no
Synpcc7942_2213	no	TN	no
Synpcc7942_2244	no	TN	no
Synpcc7942_2263	no	TN	no
Synpcc7942_2268	no	TN	no
Synpcc7942_2272	no	TN	no
Synpcc7942_2274	no	TN	no
Synpcc7942_2286	no	TN	no
Synpcc7942_2287	no	TN	no
Synpcc7942_2289	no	TN	no
Synpcc7942_2290	no	TN	no
Synpcc7942_2291	no	TN	no
Synpcc7942_2310	no	TN	no
Synpcc7942_2312	no	TN	no
Synpcc7942_2315	no	TN	no
Synpcc7942_2321	no	TN	no
Synpcc7942_2322	no	TN	no
Synpcc7942_2331	no	TN	no
Synpcc7942_2332	no	TN	no
Synpcc7942_2339	no	TN	no
Synpcc7942_2353	no	TN	no
Synpcc7942_2361	no	TN	no
Synpcc7942_2362	no	TN	no
Synpcc7942_2375	no	TN	no
Synpcc7942_2381	no	TN	no
Synpcc7942_2393	no	TN	no
Synpcc7942_2406	no	TN	no
Synpcc7942_2409	no	TN	no
Synpcc7942_2415	no	TN	no
Synpcc7942_2434	no	TN	no
Synpcc7942_2437	no	TN	no
Synpcc7942_2439	no	TN	no
Synpcc7942_2442	no	TN	no
Synpcc7942_2443	no	TN	no
Synpcc7942_2457	no	TN	no
Synpcc7942_2463	no	TN	no
Synpcc7942_2467	no	TN	no
Synpcc7942_2475	no	TN	no
Synpcc7942_2501	no	TN	no
Synpcc7942_2503	no	TN	no
Synpcc7942_2513	no	TN	no
Synpcc7942_2514	no	TN	no
Synpcc7942_2522	no	TN	no
Synpcc7942_2545	no	TN	no
Synpcc7942_2548	no	TN	no
Synpcc7942_2561	no	TN	no
Synpcc7942_2564	no	TN	no
Synpcc7942_2567	no	TN	no
Synpcc7942_2569	no	TN	no
Synpcc7942_2570	no	TN	no
Synpcc7942_2588	no	TN	no
Synpcc7942_2592	no	TN	no
Synpcc7942_2610	no	TN	no
Synpcc7942_2611	no	TN	no
Synpcc7942_0015	yes	TP	yes
Synpcc7942_0017	yes	TP	yes
Synpcc7942_0023	yes	TP	yes
Synpcc7942_0039	yes	TP	yes
Synpcc7942_0058	yes	TP	yes
Synpcc7942_0061	yes	TP	yes
Synpcc7942_0062	yes	TP	yes
Synpcc7942_0070	yes	TP	yes
Synpcc7942_0086	yes	TP	yes
Synpcc7942_0106	yes	TP	yes
Synpcc7942_0116	yes	TP	yes
Synpcc7942_0138	yes	TP	yes
Synpcc7942_0166	yes	TP	yes
Synpcc7942_0169	yes	TP	yes
Synpcc7942_0171	yes	TP	yes
Synpcc7942_0173	yes	TP	yes
Synpcc7942_0185	yes	TP	yes
Synpcc7942_0198	yes	TP	yes
Synpcc7942_0201	yes	TP	yes
Synpcc7942_0202	yes	TP	yes
Synpcc7942_0205	yes	TP	yes
Synpcc7942_0206	yes	TP	yes
Synpcc7942_0221	yes	TP	yes
Synpcc7942_0239	yes	TP	yes
Synpcc7942_0240	yes	TP	yes
Synpcc7942_0244	yes	TP	yes
Synpcc7942_0245	yes	TP	yes
Synpcc7942_0246	yes	TP	yes
Synpcc7942_0247	yes	TP	yes
Synpcc7942_0248	yes	TP	yes
Synpcc7942_0249	yes	TP	yes
Synpcc7942_0256	yes	TP	yes
Synpcc7942_0276	yes	TP	yes
Synpcc7942_0278	yes	TP	yes
Synpcc7942_0279	yes	TP	yes
Synpcc7942_0280	yes	TP	yes
Synpcc7942_0307	yes	TP	yes
Synpcc7942_0308	yes	TP	yes
Synpcc7942_0309	yes	TP	yes
Synpcc7942_0314	yes	TP	yes
Synpcc7942_0338	yes	TP	yes
Synpcc7942_0344	yes	TP	yes
Synpcc7942_0354	yes	TP	yes
Synpcc7942_0369	yes	TP	yes
Synpcc7942_0371	yes	TP	yes
Synpcc7942_0392	yes	TP	yes
Synpcc7942_0397	yes	TP	yes
Synpcc7942_0401	yes	TP	yes
Synpcc7942_0413	yes	TP	yes
Synpcc7942_0432	yes	TP	yes
Synpcc7942_0442	yes	TP	yes
Synpcc7942_0445	yes	TP	yes
Synpcc7942_0455	yes	TP	yes
Synpcc7942_0458	yes	TP	yes
Synpcc7942_0459	yes	TP	yes
Synpcc7942_0466	yes	TP	yes
Synpcc7942_0491	yes	TP	yes
Synpcc7942_0498	yes	TP	yes
Synpcc7942_0508	yes	TP	yes
Synpcc7942_0529	yes	TP	yes
Synpcc7942_0530	yes	TP	yes
Synpcc7942_0546	yes	TP	yes
Synpcc7942_0567	yes	TP	yes
Synpcc7942_0568	yes	TP	yes
Synpcc7942_0578	yes	TP	yes
Synpcc7942_0579	yes	TP	yes
Synpcc7942_0588	yes	TP	yes
Synpcc7942_0592	yes	TP	yes
Synpcc7942_0600	yes	TP	yes
Synpcc7942_0603	yes	TP	yes
Synpcc7942_0608	yes	TP	yes
Synpcc7942_0609	yes	TP	yes
Synpcc7942_0623	yes	TP	yes
Synpcc7942_0628	yes	TP	yes
Synpcc7942_0638	yes	TP	yes
Synpcc7942_0641	yes	TP	yes
Synpcc7942_0652	yes	TP	yes
Synpcc7942_0668	yes	TP	yes
Synpcc7942_0680	yes	TP	yes
Synpcc7942_0693	yes	TP	yes
Synpcc7942_0698	yes	TP	yes
Synpcc7942_0706	yes	TP	yes
Synpcc7942_0707	yes	TP	yes
Synpcc7942_0714	yes	TP	yes
Synpcc7942_0717	yes	TP	yes
Synpcc7942_0774	yes	TP	yes
Synpcc7942_0780	yes	TP	yes
Synpcc7942_0781	yes	TP	yes
Synpcc7942_0808	yes	TP	yes
Synpcc7942_0811	yes	TP	yes
Synpcc7942_0815	yes	TP	yes
Synpcc7942_0821	yes	TP	yes
Synpcc7942_0822	yes	TP	yes
Synpcc7942_0842	yes	TP	yes
Synpcc7942_0888	yes	TP	yes
Synpcc7942_0898	yes	TP	yes
Synpcc7942_0918	yes	TP	yes
Synpcc7942_0923	yes	TP	yes
Synpcc7942_0937	yes	TP	yes
Synpcc7942_0946	yes	TP	yes
Synpcc7942_0958	yes	TP	yes
Synpcc7942_0965	yes	TP	yes
Synpcc7942_0970	yes	TP	yes
Synpcc7942_0973	yes	TP	yes
Synpcc7942_0974	yes	TP	yes
Synpcc7942_0983	yes	TP	yes
Synpcc7942_0991	yes	TP	yes
Synpcc7942_0996	yes	TP	yes
Synpcc7942_1007	yes	TP	yes
Synpcc7942_1008	yes	TP	yes
Synpcc7942_1019	yes	TP	yes
Synpcc7942_1043	yes	TP	yes
Synpcc7942_1072	yes	TP	yes
Synpcc7942_1080	yes	TP	yes
Synpcc7942_1081	yes	TP	yes
Synpcc7942_1082	yes	TP	yes
Synpcc7942_1085	yes	TP	yes
Synpcc7942_1093	yes	TP	yes
Synpcc7942_1103	yes	TP	yes
Synpcc7942_1106	yes	TP	yes
Synpcc7942_1111	yes	TP	yes
Synpcc7942_1121	yes	TP	yes
Synpcc7942_1135	yes	TP	yes
Synpcc7942_1136	yes	TP	yes
Synpcc7942_1149	yes	TP	yes
Synpcc7942_1169	yes	TP	yes
Synpcc7942_1184	yes	TP	yes
Synpcc7942_1190	yes	TP	yes
Synpcc7942_1214	yes	TP	yes
Synpcc7942_1233	yes	TP	yes
Synpcc7942_1246	yes	TP	yes
Synpcc7942_1255	yes	TP	yes
Synpcc7942_1257	yes	TP	yes
Synpcc7942_1264	yes	TP	yes
Synpcc7942_1266	yes	TP	yes
Synpcc7942_1294	yes	TP	yes
Synpcc7942_1297	yes	TP	yes
Synpcc7942_1305	yes	TP	yes
Synpcc7942_1316	yes	TP	yes
Synpcc7942_1317	yes	TP	yes
Synpcc7942_1318	yes	TP	yes
Synpcc7942_1319	yes	TP	yes
Synpcc7942_1332	yes	TP	yes
Synpcc7942_1333	yes	TP	yes
Synpcc7942_1344	yes	TP	yes
Synpcc7942_1347	yes	TP	yes
Synpcc7942_1352	yes	TP	yes
Synpcc7942_1373	yes	TP	yes
Synpcc7942_1388	yes	TP	yes
Synpcc7942_1398	yes	TP	yes
Synpcc7942_1403	yes	TP	yes
Synpcc7942_1409	yes	TP	yes
Synpcc7942_1411	yes	TP	yes
Synpcc7942_1419	yes	TP	yes
Synpcc7942_1420	yes	TP	yes
Synpcc7942_1439	yes	TP	yes
Synpcc7942_1450	yes	TP	yes
Synpcc7942_1466	yes	TP	yes
Synpcc7942_1468	yes	TP	yes
Synpcc7942_1469	yes	TP	yes
Synpcc7942_1470	yes	TP	yes
Synpcc7942_1472	yes	TP	yes
Synpcc7942_1473	yes	TP	yes
Synpcc7942_1475	yes	TP	yes
Synpcc7942_1488	yes	TP	yes
Synpcc7942_1489	yes	TP	yes
Synpcc7942_1490	yes	TP	yes
Synpcc7942_1491	yes	TP	yes
Synpcc7942_1493	yes	TP	yes
Synpcc7942_1507	yes	TP	yes
Synpcc7942_1530	yes	TP	yes
Synpcc7942_1531	yes	TP	yes
Synpcc7942_1533	yes	TP	yes
Synpcc7942_1541	yes	TP	yes
Synpcc7942_1566	yes	TP	yes
Synpcc7942_1570	yes	TP	yes
Synpcc7942_1573	yes	TP	yes
Synpcc7942_1576	yes	TP	yes
Synpcc7942_1581	yes	TP	yes
Synpcc7942_1585	yes	TP	yes
Synpcc7942_1588	yes	TP	yes
Synpcc7942_1596	yes	TP	yes
Synpcc7942_1610	yes	TP	yes
Synpcc7942_1611	yes	TP	yes
Synpcc7942_1612	yes	TP	yes
Synpcc7942_1630	yes	TP	yes
Synpcc7942_1649	yes	TP	yes
Synpcc7942_1653	yes	TP	yes
Synpcc7942_1656	yes	TP	yes
Synpcc7942_1659	yes	TP	yes
Synpcc7942_1668	yes	TP	yes
Synpcc7942_1669	yes	TP	yes
Synpcc7942_1671	yes	TP	yes
Synpcc7942_1672	yes	TP	yes
Synpcc7942_1680	yes	TP	yes
Synpcc7942_1681	yes	TP	yes
Synpcc7942_1682	yes	TP	yes
Synpcc7942_1685	yes	TP	yes
Synpcc7942_1686	yes	TP	yes
Synpcc7942_1687	yes	TP	yes
Synpcc7942_1688	yes	TP	yes
Synpcc7942_1714	yes	TP	yes
Synpcc7942_1717	yes	TP	yes
Synpcc7942_1718	yes	TP	yes
Synpcc7942_1722	yes	TP	yes
Synpcc7942_1723	yes	TP	yes
Synpcc7942_1729	yes	TP	yes
Synpcc7942_1749	yes	TP	yes
Synpcc7942_1760	yes	TP	yes
Synpcc7942_1763	yes	TP	yes
Synpcc7942_1766	yes	TP	yes
Synpcc7942_1767	yes	TP	yes
Synpcc7942_1794	yes	TP	yes
Synpcc7942_1809	yes	TP	yes
Synpcc7942_1810	yes	TP	yes
Synpcc7942_1819	yes	TP	yes
Synpcc7942_1838	yes	TP	yes
Synpcc7942_1857	yes	TP	yes
Synpcc7942_1861	yes	TP	yes
Synpcc7942_1865	yes	TP	yes
Synpcc7942_1889	yes	TP	yes
Synpcc7942_1893	yes	TP	yes
Synpcc7942_1894	yes	TP	yes
Synpcc7942_1908	yes	TP	yes
Synpcc7942_1918	yes	TP	yes
Synpcc7942_1933	yes	TP	yes
Synpcc7942_1934	yes	TP	yes
Synpcc7942_1939	yes	TP	yes
Synpcc7942_1953	yes	TP	yes
Synpcc7942_1963	yes	TP	yes
Synpcc7942_1971	yes	TP	yes
Synpcc7942_1976	yes	TP	yes
Synpcc7942_1977	yes	TP	yes
Synpcc7942_1979	yes	TP	yes
Synpcc7942_1992	yes	TP	yes
Synpcc7942_1993	yes	TP	yes
Synpcc7942_1994	yes	TP	yes
Synpcc7942_2008	yes	TP	yes
Synpcc7942_2043	yes	TP	yes
Synpcc7942_2046	yes	TP	yes
Synpcc7942_2047	yes	TP	yes
Synpcc7942_2063	yes	TP	yes
Synpcc7942_2078	yes	TP	yes
Synpcc7942_2079	yes	TP	yes
Synpcc7942_2080	yes	TP	yes
Synpcc7942_2091	yes	TP	yes
Synpcc7942_2092	yes	TP	yes
Synpcc7942_2093	yes	TP	yes
Synpcc7942_2094	yes	TP	yes
Synpcc7942_2096	yes	TP	yes
Synpcc7942_2098	yes	TP	yes
Synpcc7942_2099	yes	TP	yes
Synpcc7942_2100	yes	TP	yes
Synpcc7942_2101	yes	TP	yes
Synpcc7942_2104	yes	TP	yes
Synpcc7942_2105	yes	TP	yes
Synpcc7942_2106	yes	TP	yes
Synpcc7942_2107	yes	TP	yes
Synpcc7942_2111	yes	TP	yes
Synpcc7942_2134	yes	TP	yes
Synpcc7942_2145	yes	TP	yes
Synpcc7942_2151	yes	TP	yes
Synpcc7942_2156	yes	TP	yes
Synpcc7942_2160	yes	TP	yes
Synpcc7942_2164	yes	TP	yes
Synpcc7942_2175	yes	TP	yes
Synpcc7942_2177	yes	TP	yes
Synpcc7942_2186	yes	TP	yes
Synpcc7942_2236	yes	TP	yes
Synpcc7942_2243	yes	TP	yes
Synpcc7942_2249	yes	TP	yes
Synpcc7942_2253	yes	TP	yes
Synpcc7942_2257	yes	TP	yes
Synpcc7942_2258	yes	TP	yes
Synpcc7942_2266	yes	TP	yes
Synpcc7942_2271	yes	TP	yes
Synpcc7942_2279	yes	TP	yes
Synpcc7942_2285	yes	TP	yes
Synpcc7942_2296	yes	TP	yes
Synpcc7942_2297	yes	TP	yes
Synpcc7942_2304	yes	TP	yes
Synpcc7942_2308	yes	TP	yes
Synpcc7942_2317	yes	TP	yes
Synpcc7942_2324	yes	TP	yes
Synpcc7942_2334	yes	TP	yes
Synpcc7942_2335	yes	TP	yes
Synpcc7942_2337	yes	TP	yes
Synpcc7942_2348	yes	TP	yes
Synpcc7942_2360	yes	TP	yes
Synpcc7942_2371	yes	TP	yes
Synpcc7942_2373	yes	TP	yes
Synpcc7942_2382	yes	TP	yes
Synpcc7942_2384	yes	TP	yes
Synpcc7942_2387	yes	TP	yes
Synpcc7942_2388	yes	TP	yes
Synpcc7942_2390	yes	TP	yes
Synpcc7942_2402	yes	TP	yes
Synpcc7942_2444	yes	TP	yes
Synpcc7942_2445	yes	TP	yes
Synpcc7942_2464	yes	TP	yes
Synpcc7942_2480	yes	TP	yes
Synpcc7942_2487	yes	TP	yes
Synpcc7942_2518	yes	TP	yes
Synpcc7942_2527	yes	TP	yes
Synpcc7942_2532	yes	TP	yes
Synpcc7942_2542	yes	TP	yes
Synpcc7942_2552	yes	TP	yes
Synpcc7942_2553	yes	TP	yes
Synpcc7942_2554	yes	TP	yes
Synpcc7942_2555	yes	TP	yes
Synpcc7942_2556	yes	TP	yes
Synpcc7942_2557	yes	TP	yes
Synpcc7942_2573	yes	TP	yes
Synpcc7942_2574	yes	TP	yes
Synpcc7942_2575	yes	TP	yes
Synpcc7942_2577	yes	TP	yes
Synpcc7942_2582	yes	TP	yes
Synpcc7942_2600	yes	TP	yes
Synpcc7942_2601	yes	TP	yes
Synpcc7942_2602	yes	TP	yes
Synpcc7942_2603	yes	TP	yes
Synpcc7942_2604	yes	TP	yes
Synpcc7942_2613	yes	TP	yes
Synpcc7942_B2619	yes	TP	yes
Synpcc7942_B2620	yes	TP	yes
Synpcc7942_B2623	yes	TP	yes
Synpcc7942_B2624	yes	TP	yes
Synpcc7942_B2633	yes	TP	yes
Synpcc7942_B2663	yes	TP	yes
Synpcc7942_B2664	yes	TP	yes
