# Supplementary material for: Highlighting the potential of Synechococcus elongatus PCC 7942 as platform to produce α-linolenic acid through an updated genome-scale metabolic modeling
Source: Front Microbiol. 2023 Mar 14;14:1126030. doi: 10.3389/fmicb.2023.1126030 (PMC10043229; doi:10.3389/fmicb.2023.1126030)
Supplement: Supplementary file 7 [file Table_3.XLSX]

## Sheet: reactions
Abbreviation	Description	Reaction	GPR	Genes	Proteins	Subsystem	Reversible	Lower bound	Upper bound	Objective	Confidence Score	EC Number	Notes
AGPAT182(9:12)	1-octadec-enoyl-sn-glycerol 3-phosphate O-acyltransferase (n-C18:2)	1odec912eg3p_c + octe(9:12)ACP_c -> ACP_c + pa182:9:12_c			PlsC	Fatty acid biosynthesis	0	0	1000	0	4	2.3.1.51
AGPAT183(9:12:15)	1-octadec-enoyl-sn-glycerol 3-phosphate O-acyltransferase (n-C18:3)	octe(9:12)ACP_c + 1odec91215eg3p_c -> ACP_c + pa183:9:12:15_c			PlsC	Fatty acid biosynthesis	0	0	1000	0	4	2.3.1.51
ALAtex1	ALA transport periplasm	octe(9:12:15)_c <=> octe(9:12:15)_p					1	-1000	1000	0
ALAtex2	ALA transport extracelular	octe(9:12:15)_p <=> octe(9:12:15)_e					1	-1000	1000	0
DASYN182(9:12)	CDP-diacylglycerol synthetase (n-C18:2)	h_c + pa182:9:12_c + ctp_c -> ppi_c + cdpdodec912eg_c			CdsA	Fatty acid biosynthesis	0	0	1000	0	4	2.7.7.41
DASYN183(9:12:15)	CDP-diacylglycerol synthetase (n-C18:3)	h_c + pa183:9:12:15_c + ctp_c -> ppi_c + cdpdodec91215eg_c			CdsA	Fatty acid biosynthesis	0	0	1000	0	4	2.7.7.41
DES::12	stearoyl-CoA desaturase (delta-12 desaturase)	2 h_c + o2_c + octe9ACP_c + 2 fdxrd_c -> 2 h2o_c + octe(9:12)ACP_c + 2 fdxox_c			DesA	Fatty acid biosynthesis	0	0	1000	0	4	1.14.19.1
DES::15	stearoyl-CoA desaturase (delta-15 desaturase)	2 h_c + o2_c + octe(9:12)ACP_c + 2 fdxrd_c -> 2 h2o_c + 2 fdxox_c + octe(9:12:15)ACP_c			DesB	Fatty acid biosynthesis	0	0	1000	0	4	1.14.19.1
DGDG182(9:12)	digalactosyldiacylglycerol synthase (n-C18:2)	udpgal_c + mgdg182:9:12_c -> udp_c + dgdg182:9:12_c			DgdA	Galactolipids metabolism	0	0	1000	0	4	2.4.1.241
DGDG183(9:12:15)	digalactosyldiacylglycerol synthase (n-C18:3)	udpgal_c + mgdg183:9:12:15_c -> udp_c + dgdg183:9:12:15_c			DgdA	Galactolipids metabolism	0	0	1000	0	4	2.4.1.241
DM_ALA	Demand reaction ALA	octe(9:12:15)_c ->					0	0	1000	0
DM_OA	Demand reaction OA	octe9_c ->					0	0	1000	0
EX_ALA(e)	EX ALA ext	octe(9:12:15)_e ->					0	0	1000	0
EX_OA(e)	EX OA ext	octe9_e ->					0	0	1000	0
FA182ACPHi	fatty acyl ACP hydrolase	h2o_c + octe(9:12)ACP_c -> ACP_c + h_c + octe(9:12)_c				Fatty Acid Biosynthesis	0	0	1000	0
FA183ACPHi	fatty acyl ACP hydrolase	h2o_c + octe(9:12:15)ACP_c -> ACP_c + h_c + octe(9:12:15)_c				Fatty Acid Biosynthesis	0	0	1000	0
FACOAE182	fatty acid CoA thioesterase linoleic acid	h2o_c + octe(9:12)coa_c -> coa_c + h_c + octe(9:12)_c				Fatty Acid Metabolism	0	0	1000	0
FACOAE183	fatty acid CoA thioesterase linolenic acid	h2o_c + octe(9:12:15)coa_c -> coa_c + h_c + octe(9:12:15)_c				Fatty Acid Metabolism	0	0	1000	0
FACOAL1821i	fatty acid CoA ligase	atp_c + coa_c + octe(9:12)_c -> amp_c + octe(9:12)coa_c + ppi_c	Synpcc7942_0918	Synpcc7942_0918		Fatty Acid Metabolism	0	0	1000	0
FACOAL1831i	fatty acid CoA ligase	atp_c + coa_c + octe(9:12:15)_c -> amp_c + octe(9:12:15)coa_c + ppi_c	Synpcc7942_0918	Synpcc7942_0919		Fatty Acid Metabolism	0	0	1000	0
G3PAT182(9:12)	glycerol-3-phosphate acyltransferase (C18:2)	octe(9:12)ACP_c + glyc3p_c -> ACP_c + 1odec912eg3p_c			(PlsX) or (PlsX1)	Fatty acid biosynthesis	0	0	1000	0	3	2.3.1.15
G3PAT183(9:12:15)	glycerol-3-phosphate acyltransferase (C18:3)	octe(9:12:15)ACP_c + glyc3p_c -> ACP_c + 1odec91215eg3p_c			(PlsX) or (PlsX1)	Fatty acid biosynthesis	0	0	1000	0	3	2.3.1.15
MGDG182(9:12)	UDPgalactose:1,2-diacylglycerol 3-beta-D-galactosyltransferase (n-C18:2)	udpgal_c + 12dgr182:9:12_c -> h_c + udp_c + mgdg182:9:12_c			DgdA	Galactolipids metabolism	0	0	1000	0	4	2.4.1.6
MGDG183(9:12:15)	UDPgalactose:1,2-diacylglycerol 3-beta-D-galactosyltransferase (n-C18:3)	udpgal_c + 12dgr183:9:12:15_c -> h_c + udp_c + mgdg183:9:12:15_c			DgdA	Galactolipids metabolism	0	0	1000	0	4	2.4.1.6
OAtex1	OA transport periplasm	octe9_c <=> octe9_p					1	-1000	1000	0
OAtex2	OA transport extracelular	octe9_p <=> octe9_e					1	-1000	1000	0
PAPA182(9:12)	Phosphatidate phosphatase (n-C18:2)	h2o_c + pa182:9:12_c -> pi_c + 12dgr182:9:12_c				Galactolipids metabolism	0	0	1000	0	1	3.1.3.4
PAPA183(9:12:15)	Phosphatidate phosphatase (n-C18:3)	h2o_c + pa183:9:12:15_c -> pi_c + 12dgr183:9:12:15_c				Galactolipids metabolism	0	0	1000	0	1	3.1.3.4
PGPP182(9:12)	phosphatidylglycerol phosphate phosphatase (n-C18:2)	h2o_c + pgp182:9:12_c -> pi_c + pg182:9:12_c				Fatty acid biosynthesis	0	0	1000	0	2	3.1.3.27
PGPP183(9:12:15)	phosphatidylglycerol phosphate phosphatase (n-C18:3)	h2o_c + pgp183:9:12:15_c -> pi_c + pg183:9:12:15_c				Fatty acid biosynthesis	0	0	1000	0	2	3.1.3.27
PGSA182(9:12)	Phosphatidylglycerol synthase (n-C18:2)	cdpdodec912eg_c + glyc3p_c -> h_c + cmp_c + pgp182:9:12_c			PgsA	Fatty acid biosynthesis	0	0	1000	0	4	2.7.8.5
PGSA183(9:12:15)	Phosphatidylglycerol synthase (n-C18:3)	cdpdodec91215eg_c + glyc3p_c -> h_c + cmp_c + pgp183:9:12:15_c			PgsA	Fatty acid biosynthesis	0	0	1000	0	4	2.7.8.5
SQD2_182:9:12	sulfoquinovosyltransferase (n-C18:2)	h2o_c + 12dgr182:9:12_c + udpsq_c -> h_c + udp_c + sqdg182:9:12_c			SqdX	Sulfolipid Biosynthesis	0	0	1000	0	4	2.4.1.-
SQD2_183:9:12:15	sulfoquinovosyltransferase (n-C18:3)	h2o_c + 12dgr183:9:12:15_c + udpsq_c -> h_c + udp_c + sqdg183:9:12:15_c			SqdX	Sulfolipid Biosynthesis	0	0	1000	0	4	2.4.1.-

## Sheet: metabolites
Abbreviation	Description	Neutral formula	Charged formula	Charge	Compartment	KEGG ID	PubChem ID	ChEBI ID	InChI String	SMILES
12dgr182:9:12_c	1,2-Diacyl-sn-glycerol (dioctadec-9-12-dienoyl, n-C18:2)	C39H68O5	C39H68O5	0
12dgr183:9:12:15_c	1,2-Diacyl-sn-glycerol (dioctadec-9-12-15-trienoyl, n-C18:3)	C39H64O5	C39H64O5	0
1odec91215eg3p_c	1-octadec-9-12-15-trienoyl-sn-glycerol 3-phosphate	C21H37O7P1	C21H35O7P1	-2
1odec912eg3p_c	1-octadec-9-12-dienoyl-sn-glycerol 3-phosphate	C21H39O7P1	C21H37O7P1	-2
cdpdodec91215eg_c	CDP-1,2-dioctadec-9-12-15-trienoylglycerol	C48H77N3O15P2	C48H75N3O15P2	-2
cdpdodec912eg_c	CDP-1,2-dioctadec-9-12-dienoylglycerol	C48H81N3O15P2	C48H79N3O15P2	-2
dgdg182:9:12_c	Digalactosyl-diacylglycerol(n-C18:2)	C51H84O10	C51H85O10	1
dgdg183:9:12:15_c	Digalactosyl-diacylglycerol(n-C18:3)	C51H80O10	C51H81O10	1
mgdg182:9:12_c	1,2-Diacyl-3-beta-D-galactosyl-sn-glycerol (n-C18:2)	C45H74O5	C45H74O5	0
mgdg183:9:12:15_c	1,2-Diacyl-3-beta-D-galactosyl-sn-glycerol (n-C18:3)	C45H70O5	C45H70O5	0
octe(9:12)_c	linoleoate (n-C18:2)	C29H51N2O8P	C29H50N2O8P	-1
octe(9:12)_p	linoleoate (n-C18:2)	C29H51N2O8P	C29H50N2O8P	-1
octe(9:12)_e	linoleoate (n-C18:2)	C29H51N2O8P	C29H50N2O8P	-1
octe(9:12)ACP_c	linoleoyl-ACP (n-C18:2ACP)	C29H52N2O8PRS	C29H51N2O8PRS	-1
octe(9:12)coa_c	linoleic_coenzyme_A		C39H62N7O17P3S	-4
octe(9:12:15)_c	α-lineloyl (n-C18:3)	C29H49N2O8P	C29H48N2O8P	-1
octe(9:12:15)_e	α-lineloyl (n-C18:3)	C29H49N2O8P	C29H48N2O8P	-1
octe(9:12:15)_p	α-lineloyl (n-C18:3)	C29H49N2O8P	C29H48N2O8P	-1
octe(9:12:15)ACP_c	α-lineloyl-ACP (n-C18:3ACP)	C29H50N2O8PRS	C29H49N2O8PRS	-1
octe(9:12:15)coa_c	linolenic_coenzyme_A		C39H60N7O17P3S	-4
pa182:9:12_c	1,2-dioctadec-9-12-dienoyl-sn-glycerol 3-phosphate	C39H69O8P1	C39H67O8P1	-2
pa183:9:12:15_c	1,2-dioctadec-9-12-15-trienoyl-sn-glycerol 3-phosphate	C39H65O8P1	C39H63O8P1	-2
pg182:9:12_c	Phosphatidylglycerol (dioctadec-9-12-dienoyl, n-C18:2)	C42H75O10P1	C42H74O10P1	-1
pg183:9:12:15_c	Phosphatidylglycerol (dioctadec-9-12-15-trienoyl, n-C18:3)	C42H71O10P1	C42H70O10P1	-1
pgp182:9:12_c	Phosphatidylglycerophosphate (dioctadec-9-12-dienoyl, n-C18:2)	C42H76O13P2	C42H73O13P2	-3
pgp183:9:12:15_c	Phosphatidylglycerophosphate (dioctadec-9-12-15-trienoyl, n-C18:3)	C42H72O13P2	C42H69O13P2	-3
sqdg182:9:12_c	Sulfoquinovosyldiacylglycerol (n-C18:2)	C45H76O13S	C45H75O13S	-1
sqdg183:9:12:15_c	Sulfoquinovosyldiacylglycerol (n-C18:3)	C45H72O13S	C45H71O13S	-1
