# Supplementary material for: Highlighting the potential of Synechococcus elongatus PCC 7942 as platform to produce α-linolenic acid through an updated genome-scale metabolic modeling
Source: Front Microbiol. 2023 Mar 14;14:1126030. doi: 10.3389/fmicb.2023.1126030 (PMC10043229; doi:10.3389/fmicb.2023.1126030)
Supplement: Supplementary file 8 [file Table_4.XLSX]

## Sheet: FSEOF solutions
Reaction name	Enzyme name	Gene	Gene name
Amino acid metabolism
ALAD_L	L-alanine dehydrogenase	Synpcc7942_1760	ald
GLUSfx	Glutamate synthase (ferredoxin)	Synpcc7942_0890	glsF
GLNS	Glutamine synthetase	Synpcc7942_0169 or Synpcc7942_2296 or Synpcc7942_2156	glnN/glnA/glnA
ASPTA	Aspartate transaminase	Synpcc7942_2545	aspC
PSP_L	Phosphoserine phosphatase (L-serine)	Synpcc7942_0485	gpmB
PGCD	Phosphoglycerate dehydrogenase	Synpcc7942_1501	serA
PSERT	Phosphoserine transaminase	Synpcc7942_0191	Synpcc7942_0191
Calvin cycle/Pentose phosphate pathway
PKETF	Phosphoketolase (fructose-6-phosphate utilizing)	Synpcc7942_2080	xfp
TKT2	Transketolase	Synpcc7942_0538	tktA
RPE	Ribulose 5-phosphate 3-epimerase	Synpcc7942_0604	rpe
RPI	Ribose-5-phosphate isomerase	Synpcc7942_0584	rpiA
SBP	Sedoheptulose-bisphosphatase
Fatty acid biosynthesis
MCOATA	Malonyl-CoA-ACP transacylase	Synpcc7942_1456	fabD
ACCOAC	Acetyl-CoA carboxylase	Synpcc7942_1379 and Synpcc7942_1595 and Synpcc7942_1956 and Synpcc7942_2564	accC/accA/accD/accB
DES::12	stearoyl-CoA desaturase (delta-12 desaturase)
FA183ACPHi	fatty acyl ACP hydrolase
DES::15	stearoyl-CoA desaturase (delta-15 desaturase)
3OAR180	3-oxoacyl-[acyl-carrier-protein] reductase (n-C18:0)	Synpcc7942_0684	fabG
3HAD180	3-hydroxyacyl-[acyl-carrier-protein] dehydratase (n-C18:0)	Synpcc7942_0930	fabZ
EAR180y	Enoyl-[acyl-carrier-protein] reductase (NADPH) (n-C18:0)	Synpcc7942_0126	fabI
3OAS180	3-oxoacyl-[acyl-carrier-protein] synthase (n-C18:0)	Synpcc7942_0537	fabF
3HAD160	3-hydroxyacyl-[acyl-carrier-protein] dehydratase (n-C16:0)	Synpcc7942_0930	fabZ
EAR160y	Enoyl-[acyl-carrier-protein] reductase (NADPH) (n-C16:0)	Synpcc7942_0126	fabI
3OAR120	3-oxoacyl-[acyl-carrier-protein] reductase (n-C12:0)	Synpcc7942_0684	fabG
3OAR100	3-oxoacyl-[acyl-carrier-protein] reductase (n-C10:0)	Synpcc7942_0684	fabG
3HAD100	3-hydroxyacyl-[acyl-carrier-protein] dehydratase (n-C10:0)	Synpcc7942_0930	fabZ
3OAS140	3-oxoacyl-[acyl-carrier-protein] synthase (n-C14:0)	Synpcc7942_0537	fabF
3OAR140	3-oxoacyl-[acyl-carrier-protein] reductase (n-C14:0)	Synpcc7942_0684	fabG
3OAR160	3-oxoacyl-[acyl-carrier-protein] reductase (n-C16:0)	Synpcc7942_0684	fabG
EAR120y	Enoyl-[acyl-carrier-protein] reductase (NADPH) (n-C12:0)	Synpcc7942_0126	fabI
3HAD140	3-hydroxyacyl-[acyl-carrier-protein] dehydratase (n-C14:0)	Synpcc7942_0930	fabZ
EAR100y	Enoyl-[acyl-carrier-protein] reductase (NADPH) (n-C10:0)	Synpcc7942_0126	fabI
3OAS120	3-oxoacyl-[acyl-carrier-protein] synthase (n-C12:0)	Synpcc7942_0537	fabF
3OAS100	3-oxoacyl-[acyl-carrier-protein] synthase (n-C10:0)	Synpcc7942_0537	fabF
EAR140y	Enoyl-[acyl-carrier-protein] reductase (NADPH) (n-C14:0)	Synpcc7942_0126	fabI
3HAD120	3-hydroxyacyl-[acyl-carrier-protein] dehydratase (n-C12:0)	Synpcc7942_0930	fabZ
3OAS160	3-oxoacyl-[acyl-carrier-protein] synthase (n-C16:0)	Synpcc7942_0537	fabF
3HAD60	3-hydroxyacyl-[acyl-carrier-protein] dehydratase (n-C6:0)	Synpcc7942_0930	fabZ
3OAR60	3-oxoacyl-[acyl-carrier-protein] reductase (n-C6:0)	Synpcc7942_0684	fabG
3OAR80	3-oxoacyl-[acyl-carrier-protein] reductase (n-C8:0)	Synpcc7942_0684	fabG
EAR60y	Enoyl-[acyl-carrier-protein] reductase (NADPH) (n-C6:0)	Synpcc7942_0126	fabI
3HAD80	3-hydroxyacyl-[acyl-carrier-protein] dehydratase (n-C8:0)	Synpcc7942_0930	fabZ
3OAS80	3-oxoacyl-[acyl-carrier-protein] synthase (n-C8:0)	Synpcc7942_0537	fabF
3HAD40_1	3-hydroxyacyl-[acyl-carrier-protein] dehydratase (n-C4:0)	Synpcc7942_0930	fabZ
3OAS60	3-oxoacyl-[acyl-carrier-protein] synthase (n-C6:0)	Synpcc7942_0537	fabF
EAR40y	Enoyl-[acyl-carrier-protein] reductase (NADPH) (n-C4:0)	Synpcc7942_0126	fabI
EAR80y	Enoyl-[acyl-carrier-protein] reductase (NADH) (n-C8:0)	Synpcc7942_0126	fabI
KAS15	Beta-ketoacyl-ACP synthase (2)	Synpcc7942_1455	fabH
DESAT18a	Stearoyl ACP delta-9 desaturase	Synpcc7942_2561	desC
Glycolysis/Gluconeogenesis
PGK	Phosphoglycerate kinase	Synpcc7942_1116	pgk
GAPDi_nadp	Glyceraldehyde-3-phosphate dehydrogenase (NAD(P)+) (phosphorylating)	Synpcc7942_1742	gap2
FBP	Fructose-bisphosphatase	Synpcc7942_0505 or Synpcc7942_2335	glpX/fbp
Photorespiration/Glyoxylate Degredation
GLYCK	Glycerate kinase	Synpcc7942_0996	Synpcc7942_0996
GLYCOR_nadp	D-Glycerate:NADP+ 2-oxidoreductase	Synpcc7942_1857	mmsB
Photosynthesis/respiration
PHOA690um	Photon absorption (680-700nm)	NA
PSIum	State transition energy transfer (PSII ChlA Qy to PSI ChlA Qy)
PSICSum	Photosystem I charge separation	Synpcc7942_0407 and Synpcc7942_0535 and Synpcc7942_0654 and Synpcc7942_0920 and Synpcc7942_1002 and Synpcc7942_1249 and Synpcc7942_1250 and Synpcc7942_1322 and Synpcc7942_1912a and Synpcc7942_2048 and Synpcc7942_2049 and Synpcc7942_2321 and Synpcc7942_2342 and Synpcc7942_2343 and Synpcc7942_2513	psaK1/psaC/ycf4/psaK1 psaD/psaJ/psaF/psaE/psaM/psaB/psaA/ycf3/psaL/psaI/btpA
CBFCum	Cytb6f complex	Synpcc7942_1231 and Synpcc7942_2331 and Synpcc7942_1232 and Synpcc7942_2332 and Synpcc7942_1088 and Synpcc7942_1479 and ( Synpcc7942_0239 or Synpcc7942_1630 or Synpcc7942_2542 ) and Synpcc7942_0113 and Synpcc7942_2426 and Synpcc7942_0475 and Synpcc7942_1053 and Synpcc7942_1048 and Synpcc7942_1052 and Synpcc7942_1047 and Synpcc7942_1049 and Synpcc7942_1050 and Synpcc7942_1051 and Synpcc7942_1054 a…	cytf/petB/petC/petD/petE/petG/petJ/cytA/petJ/petL/petM/petN/cpcA2/cpcA1/cpcB2/cpcB1/cpcH/cpcI/cpcD/cpcE/cpcF/cpcG/apcA/ apcB/apcC/apcE/apcF/ycf44/ccdA/cytM/ccsA
PSIICSum	Photosystem II charge separation	( Synpcc7942_0224 and Synpcc7942_0225 and Synpcc7942_0294 and Synpcc7942_0343 and Synpcc7942_0424 and Synpcc7942_0456 and Synpcc7942_0655 and Synpcc7942_0656 and Synpcc7942_0696 and Synpcc7942_0697 and Synpcc7942_0699 and Synpcc7942_0893 and Synpcc7942_1038 and Synpcc7942_1174 and Synpcc7942_1175 and Synpcc7942_1176 and Synpcc7942_1177 and Synpcc7942_1637 and Synpcc7942_1678 and Synpcc7942_1679 a…	psbN/psbH/psbO/psb27/psbAI/psbK/psbDI/psbC/psbT/psbB/psbM/psbAIII/Synpcc7942_1038/psbJ/psbL/psbF/psbE/psbDII/Synpcc7942_1678/psb28/psbI/psbU/psbY/psbX/psbZ/psb28-2/psbV/psbN/psbH/psbO/psb27/psbAI/psbK/psbDI/psbC/psbT/psbB/psbM/Synpcc7942_1038/psbJ/psbL/psbF/psbE/psbAII/psbDII/Synpcc7942_1678/psb28/psbI/psbU/psbY/psbX/psbZ/psb28-2/psbV
PHOA670um	Photon absorption (660nm-680nm)
ETCPC	Energy transfer (Phycocyanin to allophycocyanin)	Synpcc7942_0325 and Synpcc7942_0326 and Synpcc7942_0327 and Synpcc7942_0328 and Synpcc7942_1047 and Synpcc7942_1048 and Synpcc7942_1052 and Synpcc7942_1053 and Synpcc7942_1055 and Synpcc7942_1049 and Synpcc7942_1050 and Synpcc7942_2030 and Synpcc7942_1051	apcC/apcB/apcA/apcE/cpcB1/cpcA1/cpcB2/cpcA2/cpcF/cpcH/cpcI/cpcG/cpcD
ETAPCPSII	Energy transfer (Allophycocyanin to PSII ChlA Qy)
NDH-1(4)um	NAD(P)H dehydrogenase, carbon dioxide coupled (plastoquinone-8 & 4 protons)( Thylakoid)	Synpcc7942_1343 and Synpcc7942_1415 and Synpcc7942_1180 and Synpcc7942_1346 and Synpcc7942_1345 and Synpcc7942_1743 and Synpcc7942_1344 and Synpcc7942_1182 and Synpcc7942_1181 and Synpcc7942_0413 and Synpcc7942_2234 and Synpcc7942_1982 and Synpcc7942_2487 and Synpcc7942_2257 and Synpcc7942_1908 and Synpcc7942_1106 and Synpcc7942_2092 and Synpcc7942_2091 and Synpcc7942_2093 and Synpcc7942_2094	ndhA/ndhB/ndhC/ndhE/ndhG/ndhH/ndhI/ndhJ/ndhK/ndhL/Synpcc7942_2234/Synpcc7942_1982/Synpcc7942_2487/Synpcc7942_2257/Synpcc7942_1908/Synpcc7942_1106/ndhD3/ndhD3/chpY/Synpcc7942_2094
ATPSum	ATP synthase (thylakoid membrane)	Synpcc7942_0330 and Synpcc7942_0331 and Synpcc7942_0332 and Synpcc7942_0333 and Synpcc7942_0334 and Synpcc7942_0335 and Synpcc7942_0336 and Synpcc7942_0337 and Synpcc7942_2315 and Synpcc7942_2316	atp1/atpI/atpH/atpG/atpF/atpD/atpA/atpC/atpB/atpE
PSIIum	Photosystem II	( Synpcc7942_0224 and Synpcc7942_0225 and Synpcc7942_0294 and Synpcc7942_0343 and Synpcc7942_0424 and Synpcc7942_0456 and Synpcc7942_0655 and Synpcc7942_0656 and Synpcc7942_0696 and Synpcc7942_0697 and Synpcc7942_0699 and Synpcc7942_0893 and Synpcc7942_1038 and Synpcc7942_1174 and Synpcc7942_1175 and Synpcc7942_1176 and Synpcc7942_1177 and Synpcc7942_1637 and Synpcc7942_1678 and Synpcc7942_1679 a…	psbN/psbH/psbO/psb27/psbAI/psbK/psbDI/psbC/psbT/psbB/psbM/psbAIII/Synpcc7942_1038/psbJ/psbL/psbF/psbE/psbDII/Synpcc7942_1678/psb28/psbI/psbU/psbY/psbX/psbZ/psb28-2/psbV/psbN/psbH/psbO/psb27/psbAI/psbK/psbDI/psbC/psbT/psbB/psbM/Synpcc7942_1038/psbJ/psbL/psbF/psbE/psbAII/psbDII/Synpcc7942_1678/psb28/psbI/psbU/psbY/psbX/psbZ/psb28-2/psbV
Pyruvate metabolism/TCA Reactions
ACS	Acetyl-CoA synthetase	Synpcc7942_1352
Transport
O2tpp	O2 transport via diffusion (periplasm)
ADK1	Adenylate kinase	Synpcc7942_2213	adk
O2tex	Oxygen transport via diffusion (extracellular to periplasm)
O2tu	O2 transport (diffusion), lumen
