# Supplementary material for: Highlighting the potential of Synechococcus elongatus PCC 7942 as platform to produce α-linolenic acid through an updated genome-scale metabolic modeling
Source: Front Microbiol. 2023 Mar 14;14:1126030. doi: 10.3389/fmicb.2023.1126030 (PMC10043229; doi:10.3389/fmicb.2023.1126030)
Supplement: Supplementary file 9 [file Table_5.XLSX]

## Sheet: Optknock and GDLS solutions
Name of mutant	Number of KOs	Method	Growth rate (h-1)	ALA yield (mmol gDCW-1 h-1)	Reaction name	Enzyme name	Genes associated
GDLS2-A	2	GDLS	0.0305	0.1551	GND	Phosphogluconate dehydrogenase	Synpcc7942_0039		*indicates an essential gene.
					PGCD	Phosphoglycerate dehydrogenase	Synpcc7942_1501*
GDLS2-B	2	GDLS	0.0305	0.1551	PGL	6-phosphogluconolactonase	Synpcc7942_0529
					PSERT	Phosphoserine transaminase	Synpcc7942_0191*
GDLS2-C	2	GDLS	0.0305	0.1551	PSERT	Phosphoserine transaminase	Synpcc7942_0191*
					G6PDH2r	Glucose 6-phosphate dehydrogenase	Synpcc7942_2334
OK2	2	OptKnock	0.0497	0.1135	GHMT2r	Glycine hydroxymethyltransferase	Synpcc7942_0282*
					PGL	6-phosphogluconolactonase	Synpcc7942_0529
GDLS3-A	3	GDLS	0.0199	0.178	PSP_L	Phosphoserine phosphatase (L-serine)	Synpcc7942_0485*
					ALAD_L	L-alanine dehydrogenase	Synpcc7942_1760
					G6PDH2r	Glucose 6-phosphate dehydrogenase	Synpcc7942_2334
GDLS3-B	3	GDLS	0.0199	0.178	GND	Phosphogluconate dehydrogenase	Synpcc7942_0039
					PSP_L	Phosphoserine phosphatase (L-serine)	Synpcc7942_0485*
					ALAD_L	L-alanine dehydrogenase	Synpcc7942_1760
OK3-A	3	OptKnock	0.0497	0.1135	ACOATA	Acetyl-CoA ACP transacylase	Synpcc7942_1455*
					G6PDH2r	Glucose 6-phosphate dehydrogenase	Synpcc7942_2334
					GHMT2r	Glycine hydroxymethyltransferase	Synpcc7942_0282*
OK3-B	3	OptKnock	0.0305	0.1551	GND	Phosphogluconate dehydrogenase	Synpcc7942_0039
					PGCD	Phosphoglycerate dehydrogenase	Synpcc7942_1501*
					PYK	Pyruvate kinase	Synpcc7942_0098*
OK3-C	3	OptKnock	0.0199	0.178	ALAD_L	L-alanine dehydrogenase	Synpcc7942_1760
					PGL	6-phosphogluconolactonase	Synpcc7942_0529
					PSERT	Phosphoserine transaminase	Synpcc7942_0191*
OK3-D	3	OptKnock	0.0493	0.1145	G6PDH2r	Glucose 6-phosphate dehydrogenase	Synpcc7942_2334
					GART	GAR transformylase-T	Synpcc7942_0588
					GHMT2r	Glycine hydroxymethyltransferase	Synpcc7942_0282*
OK3-E	3	OptKnock	0.0199	0.178	ALAD_L	L-alanine dehydrogenase	Synpcc7942_1760
					PGL	6-phosphogluconolactonase	Synpcc7942_0529
					PSERT	Phosphoserine transaminase	Synpcc7942_0191*
GDLS4	4	GDLS	0.0165	0.1853	PSP_L	Phosphoserine phosphatase (L-serine)	Synpcc7942_0485*
					G6PDH2r	Glucose 6-phosphate dehydrogenase	Synpcc7942_2334
					ALAD_L	L-alanine dehydrogenase	Synpcc7942_1760
					VALTA	Valine transaminase	Synpcc7942_1029
OK4-A	4	OptKnock	0.049	0.1086	FUM	Fumarase	Synpcc7942_1007
					G6PDH2r	Glucose 6-phosphate dehydrogenase	Synpcc7942_2334
					GHMT2r	Glycine hydroxymethyltransferase	Synpcc7942_0282*
					H2CO3_NAt_syn	Sodium/bicarbonate symporter (SbtA)	Synpcc7942_1475 or Synpcc7942_0357
OK4-B	4	OptKnock	0.0497	0.1135	G6PDH2r	Glucose 6-phosphate dehydrogenase	Synpcc7942_2334
					GHMT2r	Glycine hydroxymethyltransferase	Synpcc7942_0282*
					PDS2	Phytofluene dehydrogenase	Synpcc7942_1983
					PYK	Pyruvate kinase	Synpcc7942_0098*
OK4-C	4	OptKnock	0.0497	0.1135	G6PDH2r	Glucose 6-phosphate dehydrogenase	Synpcc7942_2334
					GHMT2r	Glycine hydroxymethyltransferase	Synpcc7942_0282*
					FBA	Fructose-bisphosphate aldolase	Synpcc7942_1443*
					FALGTHLs	Formaldehyde glutathione ligase	NA
OK4-D	4	OptKnock	0.0493	0.1145	GART	GAR transformylase-T	Synpcc7942_0588
					GHMT2r	Glycine hydroxymethyltransferase	Synpcc7942_0282*
					GND	Phosphogluconate dehydrogenase	Synpcc7942_0039
					AGDI	Agmatine deiminase	Synpcc7942_2402
GDLS5	5	GDLS	0.0165	0.1853	GND	Phosphogluconate dehydrogenase	Synpcc7942_0039
					PSP_L	Phosphoserine phosphatase (L-serine)	Synpcc7942_0485*
					ALAD_L	L-alanine dehydrogenase	Synpcc7942_1760
					VALTA	Valine transaminase	Synpcc7942_1029
					ALCD1	Alcohol dehydrogenase (glycerol)	Synpcc7942_2285 or Synpcc7942_1653
